# Supplementary material for: Structure and isomerization behavior relationships of new push–pull azo-pyrrole photoswitches
Source: Royal Society of Chemistry journal article supplement (doi:10.1039/d4ob00417e), 2024-01-01
Supplement: d4ob00417e1.pdf [file d4ob00417e1.pdf]

**Supporting Information**  
**Structure and isomerization behavior relationship of new push–pull azo-pyrrole**  
**photoswitches**

D. Gallardo-Rosas,<sup>a</sup> J. M. Guevara-Vela,<sup>b</sup> T. Rocha-Rinza,<sup>b</sup> R. A. Toscano,<sup>b</sup> J. G. López-Cortés,<sup>b</sup> and M. C. Ortega-Alfaro\*<sup>a</sup>

**Table of contents**

|                                                                                                                                                   |     |
|---------------------------------------------------------------------------------------------------------------------------------------------------|-----|
| <b>1. General Information</b>                                                                                                                     |     |
| <b>2. Materials</b> .....                                                                                                                         | S2  |
| <b>3. Methods</b> .....                                                                                                                           | S2  |
| <b>4. Spectroscopic characterization of precursor <b>1a</b> and compounds <b>2a-d</b>, <b>3a-d</b>, <b>4b-d</b></b> .....                         | S2  |
| <b>5. The <sup>1</sup>H NMR and <sup>13</sup>C NMR spectra of compound <b>1a</b></b> .....                                                        | S10 |
| <b>6. The <sup>1</sup>H NMR and <sup>13</sup>C NMR spectra of compounds <b>2a-d</b></b> .....                                                     | S11 |
| <b>7. The <sup>1</sup>H NMR and <sup>13</sup>C NMR spectra of compounds <b>3a-d</b></b> .....                                                     | S15 |
| <b>8. The <sup>1</sup>H NMR and <sup>13</sup>C NMR spectra of compounds <b>4b-d</b></b> .....                                                     | S20 |
| <b>9. Structure determination by X-Ray crystallography</b> .....                                                                                  | S22 |
| <b>10. Table S1. X-Ray Data Collection and Structure Refinement Details for <b>2a</b> y <b>3b</b></b> .....                                       | S22 |
| <b>11. Figure S34. ORTEP representation of <b>3b</b></b> .....                                                                                    | S23 |
| <b>12. UV-visible spectroscopic studies and Photoisomerization studies for</b><br><b>compounds <b>2a-d</b>, <b>3a-d</b> and <b>4b-d</b></b> ..... | S24 |
| <b>13. Computational studies</b> .....                                                                                                            | S45 |
| <b>14. References</b> .....                                                                                                                       | S49 |

## 1. General Information

The synthesis of the palladium complex used in the cross-coupling reactions was conducted under argon atmosphere with standard Schlenk techniques as reported elsewhere.<sup>1</sup> All temperature given for reaction conditions are externally measured. All reactions were monitored by TLC.

## 2. Materials

Commercial materials were used as received: CH<sub>2</sub>Cl<sub>2</sub> purchased from Sigma-Aldrich in anhydrous form. CHCl<sub>3</sub>, Methanol were purchased from Sigma-Aldrich in HPLC and/or spectrophotometric quality. ASTM type 1 ultra-pure water (Millipore-Q system, 18.2 M Ωcm) was used as solvent for the aggregation studies. HCl, NaNO<sub>2</sub>, *N*-methylpyrrole, pyridine, 4-Iodoaniline, Cr(CO)<sub>6</sub>, Et<sub>3</sub>OBF<sub>4</sub>, S<sub>8</sub>, NaBH<sub>4</sub>, PdCl<sub>2</sub>, and K<sub>2</sub>CO<sub>3</sub> were purchased from Sigma-Aldrich. Analytical thin layer chromatography was performed on DC-Fertigfolien ALUGRAM® Xtra SIL G/UV254 MACHEREY-NAGEL. Column chromatography was performed on Silica 60, 0.063-0.2 mm MACHEREY-NAGEL.

## 3. Methods

Melting points were obtained on a Stuart Melting Point Apparatus SMP10 and they are uncorrected. All compounds were characterized by IR spectra, recorded on a Perkin-Elmer Spectrum 100 FT-IR spectrophotometer provide with an ATR polarization attachment and all data are expressed in wave numbers (cm<sup>-1</sup>). NMR spectra were measured on a Bruker Avance 300 Spectrometer, at an operating frequency of 300 MHz for <sup>1</sup>H and 75 MHz for <sup>13</sup>C, using tetramethylsilane (TMS) as internal reference and CDCl<sub>3</sub> as solvent; chemical shifts values are given in parts per million (ppm), relative to TMS. Mass spectrometry analyses were obtained on a JEOL SX102A (EI<sup>+</sup> and FAB<sup>+</sup>) and on an AccuTOF JMS-T100LC (DART), the values of the signals are expressed in mass/charge units (*m/z*), followed by the relative intensity with reference to a 100% base peak. UV-Vis absorption spectra were recorded at 298 K on a Thermo-Scientific Evolution 60S UV-Vis spectrophotometers, using spectrophotometric grade solvents purchased from Sigma-Aldrich Co. and 1 cm quartz cell. The solvatochromic study was performed

using  $10^{-5}$  M to  $10^{-4}$  M solutions of azopyrrole dyes in several solvents at room temperature. The aggregation study was carried out using  $5 \times 10^{-5}$  M solutions of azopyrrole dyes at different MeOH: H<sub>2</sub>O ratios, from 100:0 to 20:80 at room temperature.

**Synthesis of compound 1:** In a 100 mL round-flask, 4-Iodoaniline (2.51 g, 11.2 mmol) and *N*-methylpyrrole (1 mL, 11.2 mmol), were dissolved in 6 mL of MeOH, then HCl [1M] (10 mL, 0.01 mol) was added and the mixture was cooled at mixed at 0 °C. Then, an aqueous solution of sodium nitrite (0.93 g, 13.4 mmol in the minimum quantity of water) was added dropwise. The mixture was stirred for 10 minutes at 0 °C and then for 30 more minutes at room temperature. A solution of 10% NaOH was added until pH=10 and then, the mixture was extracted with CH<sub>2</sub>Cl<sub>2</sub> and dried with anhydrous Na<sub>2</sub>SO<sub>4</sub>. The crude product was purified by column chromatography on silica gel with hexane. The spectroscopic data agreed with those reported in the literature.<sup>ii</sup>

2-(4'-Iodophenyl-azo)-*N*-methyl pyrrole (**1a**).

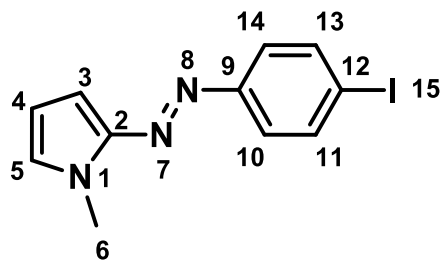

Orange solid. Yield (80 %). mp 98 °C. **<sup>1</sup>H NMR** (300 MHz, CDCl<sub>3</sub>, ppm): δ 3.95 (s, 3H, H6), 6.30 (t, 1H, H4), 6.72 (d, 1H, H-3), 6.96 (t, 1H, H-5), 7.79, 7.76 (m, 2H, H-11,13), 7.55, 7.52 (m, 2H, H-10,14). **<sup>13</sup>C NMR** (75 MHz, CDCl<sub>3</sub>, ppm): δ 33.4 (C-6), 95.03 (C-12), 100.6 (C-4), 110.57 (C-3), 123.7 (C-10,14), 127.5 (C-5), 138.1 (C-11,13), 146.4 (C-2), 153 (C-9).

**HR-MS** (FAB+) m/z for C<sub>11</sub>H<sub>10</sub>N<sub>3</sub>I: calculated 310.9919, found 310.9923.

**Synthesis of vinyl arenes.** In a 100 mL round flask were added 1 g of the corresponding aldehyde, 1.2 equiv. of methyl triphenylphosphonium bromide and 2 equiv. of K<sub>2</sub>CO<sub>3</sub> in 40 mL of THF. The mixture reaction was refluxed for 12 h. Afterward, the solvent was removed via a reduced pressure distillation and the crude was redissolved in 20 mL of dichloromethane, washed with water (2 x 20 mL) and dried with anhydrous Na<sub>2</sub>SO<sub>4</sub>. The crude product was purified by column chromatography on silica gel with hexane. All vinyl arenes synthesized were characterized by NMR and their data agreed with the literature.<sup>iii</sup>

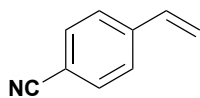

4-Vinyl benzonitrile. Colorless liquid:  $^1\text{H}$  NMR (300 MHz,  $\text{CDCl}_3$ , ppm):  $\delta$  7.61 (d,  $J = 8.3$  Hz, 2H), 7.48 (d,  $J = 8.1$  Hz, 2H), 6.73 (dd,  $J = 17.6$ , 10.9 Hz, 1H), 5.88 (d,  $J = 17.6$  Hz, 1H), 5.45 (d,  $J = 10.9$  Hz, 1H).  $^{13}\text{C}$  NMR (75 MHz,  $\text{CDCl}_3$ , ppm):  $\delta$  141.9, 135.4, 132.4, 126.7, 117.7, 111.1.

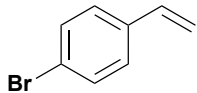

4-Bromo styrene. Colorless liquid:  $^1\text{H}$  NMR (300 MHz,  $\text{CDCl}_3$ , ppm):  $\delta$  7.43 (d,  $J = 8.5$  Hz, 2H), 7.24 (d,  $J = 8.5$  Hz, 2H), 6.63 (dd,  $J = 17.6$ , 10.9 Hz, 1H), 5.72 (d,  $J = 17.6$  Hz, 1H), 5.26 (d,  $J = 10.9$  Hz, 1H).  $^{13}\text{C}$  NMR (75 MHz,  $\text{CDCl}_3$ , ppm):  $\delta$  136.5, 135.8, 131.7, 127.8, 121.6, 114.6.

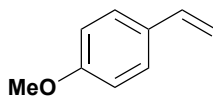

1-Methoxy-4-vinylbenzene. Colorless liquid:  $^1\text{H}$  NMR (300 MHz,  $\text{CDCl}_3$ , ppm):  $\delta$  7.34 (d,  $J = 8.5$  Hz, 2H), 6.85 (d,  $J = 8.8$  Hz, 2H), 6.65 (dd,  $J = 17.6$ , 10.9 Hz, 1H), 5.60 (d,  $J = 17.6$  Hz, 1H), 5.11 (d,  $J = 10.9$  Hz, 1H), 3.79 (s, 3H).  $^{13}\text{C}$  NMR (75 MHz,  $\text{CDCl}_3$ , ppm):  $\delta$  159.4, 136.2, 130.5, 127.4, 113.9, 111.6, 55.3.

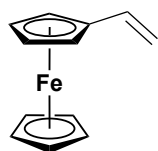

Vinyl ferrocene. Orange powder.  $^1\text{H}$  NMR (300 MHz,  $\text{CDCl}_3$ , ppm):  $\delta$  d 6.52 (dd,  $J = 16.6$ , 11.0 Hz, 1H), 4.81 (dd,  $J = 17.3$ , 1.2 Hz, 1H), 4.61 (dd,  $J = 10.2$ , 1.2 Hz, 1H), 4.18 (s, 2H), 4.12 (s, 2H), 4.09 (s, 5H).  $^{13}\text{C}$  NMR (75 MHz,  $\text{CDCl}_3$ , ppm):  $\delta$  135.1, 111.4, 83.9, 69.6, 69.1, 67.1.

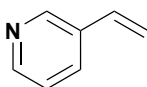

3-Vinylpyridine. Colorless liquid:  $^1\text{H}$  NMR (300 MHz,  $\text{CDCl}_3$ , ppm):  $\delta$  5.35 (d,  $J = 11.0$  Hz, 1H), 5.80 (d,  $J = 17.6$  Hz, 1H), 6.68 (dd,  $J = 17.6$ , 11.0 Hz, 1H), 7.22 (dd,  $J = 7.9$ , 4.9 Hz, 1H), 7.70 (dd,  $J = 7.9$ , 2.3, 1.6 Hz, 1H), 8.46 (dd,  $J = 4.9$ , 1.6 Hz, 1H), 8.73 (d,  $J = 2.3$  Hz, 1H).  $^{13}\text{C}$  NMR (75 MHz,  $\text{CDCl}_3$ , ppm):  $\delta$  116.2, 123.4, 132.6, 133.0, 133.5, 148.3, 148.9.

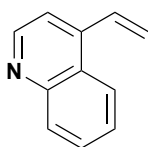

4-Vinyl quinoline. Pale yellow liquid.  $^1\text{H}$  NMR (300 MHz,  $\text{CDCl}_3$ , ppm):  $\delta$  8.89-7.50 (m, 6 H), 7.45 (q,  $J = 23.0$ , 14.4 Hz, 1 H), 6.01 (q,  $J = 23.0$ , 14.4 Hz, 1 H).  $^{13}\text{C}$  NMR (75 MHz,  $\text{CDCl}_3$ , ppm):  $\delta$  150.4, 148.6, 143.8, 132.3, 130.1, 129.5, 126.8, 126.4, 123.7, 121.0, 117.6.

**Synthesis of Stilbenyl-azopyrroles 2a-d and 3a-d.** A 10 mL vial was filled with compound **1** (0.5 mmol), triethylamine (0.75 mmol), the corresponding vinyl arene (0.6 mmol), 5 mL of DMF as solvent and 0.1% mol of the palladium complex.<sup>i</sup> The vial was introduced into a stainless-steel reactor and placed in an oil bath at 160 °C. After the reaction is completed, the reactor was cooled to room temperature, the system was decompressed, and the mixture of reaction was diluted with 30 mL of water and extracted with hexane (3 × 20 mL). The combined organic layers were dried over anhydrous  $\text{Na}_2\text{SO}_4$  and the solvent was afterwards evaporated under vacuum. The crude was purified by chromatography on silica gel using Hexane-AcOEt.

1-methyl-2-((*E*)-(4-((*E*)-4-(trifluoromethyl)styryl)phenyl)diazenyl) pyrrole (**2a**).

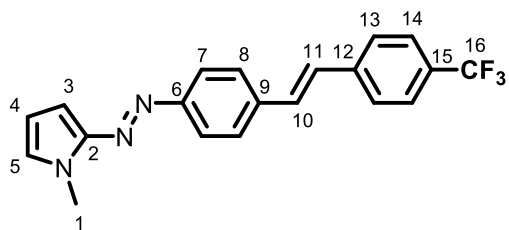

Orange solid. Yield (71 %) mp 161 °C, **IR** (cm<sup>-1</sup>) 3123 (C-H pyrrole), 1611 (C=C), 1356 (C-F), 1319 (N=N), 1319 (CF<sub>3</sub>) **<sup>1</sup>H NMR** (300 MHz, CDCl<sub>3</sub>, ppm): δ 7.76 (d, *J* = 9 Hz, 2H, H8), δ 7.54 (m, 6H, H7,13 y 14), 7.16 (d, *J* = 15 Hz, 1H, H10), 7.09 (d, *J* = 15, 1H, H11), 6.88 (m, 1H, H5), 6.66 (dd *J* = 3.0, 1.5 Hz, 1H, H3), 6.24 (dd, *J* = 3.0, 2.4 Hz, 1H, H4), 3.90 (s, 2H, H1). **<sup>13</sup>C NMR** (75 MHz, CDCl<sub>3</sub>, ppm): δ 153.41 (C6), 146.73 (C2), 140.68 (C9), 137.52 (C12), 130.60 (C10), 129.59 (q, *J*<sub>C-F</sub> = 32.25 Hz, C15), 127.72 (C11), 127.45 (C7), 127.26 (C5), 126.67 (C13), 125.26 (q, *J*<sub>C-F</sub> = 269 Hz, C16), 125.69 (q, *J*<sub>C-F</sub> = 3.75 Hz, C14), 122.55 (C8), 110.48 (C4), 100.24 (C3), 33.45 (C1). **MS** (DART<sup>+</sup> *m/z*): 356 [M<sup>+</sup>]. **HR-MS** (ESI<sup>+</sup> *m/z*) for C<sub>20</sub>H<sub>17</sub>F<sub>3</sub>N<sub>3</sub>: calculated 356.13746, found 356.13658 [M<sup>+</sup>+1].

4-((*E*)-4-((*E*)-(1-methyl-1H-pyrrol-2-yl)diazenyl)styryl)benzonitrile (**2b**).

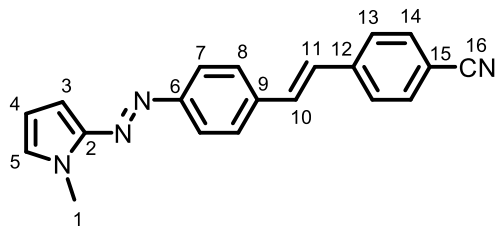

Orange-red solid. Yield (73 %) mp 161-164 °C, **IR** (cm<sup>-1</sup>) 1600 (C=C), 3127 (C-H pyrrole), 2222 (C≡N), 1329 (N=N). **<sup>1</sup>H NMR** (300 MHz, CDCl<sub>3</sub>, ppm): δ 7.86 (d, *J* = 9 Hz, 2H, H8), 7.68-7.60 (m, 6H, H7,13 y 14), 7.28 (d, *J* = 15 Hz, 1H, H11), 7.16 (d, *J* = 15 Hz, 1H, H10), 6.99 (m, 1H, H5), 6.76 (dd, *J* = 4.2, 1.5 Hz, 1H, H3), 6.34 (dd, *J* = 4.2, 2.7 Hz, 1H, H4) 4 (s, 3H, H1). **<sup>13</sup>C NMR** (300 MHz, CDCl<sub>3</sub>, ppm) δ 153.62 (C6), 146.74 (C2), 141.72 (C12), 137.11 (C9), 132.53 (C14), 131.78 (C10), 127.62 (C8), 127.43 (C11), 127.26 (C5), 126.94 (C13), 122.58 (C7), 119.05 (C16), 110.67 (C15), 110.57 (C4), 100.41 (C3), 33.47 (C1). **MS** (DART<sup>+</sup> *m/z*): 313 [M<sup>+</sup>]. **HR-MS** (ESI<sup>+</sup> *m/z*) for C<sub>20</sub>H<sub>17</sub>N<sub>4</sub>: calculated 313.14532, found 313.14422 [M<sup>+</sup>+1].

2-((*E*)-(4-((*E*)-4-bromostyryl)phenyl)diazenyl)-1-methylpyrrole (**2c**).

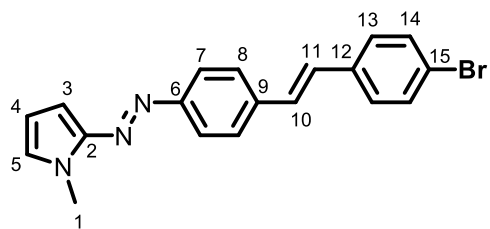

Orange solid. Yield (58%) mp 148 °C decomposition.

**IR** (cm<sup>-1</sup>) 1616 (C=C), 1323 (N=N), 1070 (Ar-*p*-Br).

**<sup>1</sup>H NMR** (300 MHz, CDCl<sub>3</sub>, ppm): δ 7.84 (d, *J* = 8.4 Hz, 2H, H8), 7.61 (d, *J* = 8.4 Hz, 2H, H7), 7.52 (d, *J* = 8.4 Hz, 2H, H13), 7.42 (d, *J* = 8.4 Hz, 2H, H14), 7.17 (d, *J* = 15 Hz, 1H, H11), 7.11 (d, *J* = 15 Hz, 1H, H10), 6.98 (m, 1H, H5), 6.75 (m, 1H, H3), 6.33 (m, 1H, H4), 4 (s, 3H, H1).

**<sup>13</sup>C NMR** (75 MHz, CDCl<sub>3</sub>, ppm) δ 153.15 (C6), 146.72 (C2), 137.92 (C9), 136.17 (C12), 131.85 (C13), 128.82 (C11), 128.07 (C10, C14), 127.20 (C8), 127.11 (C5), 122.54 (C7), 121.55 (C15), 110.41 (C4), 100.10 (C3), 33.45 (C1). **MS** (EI<sup>+</sup> *m/z*): 365 [M<sup>+</sup>], 367 [M<sup>+</sup>+2].

**HR-MS** (ESI<sup>+</sup> *m/z*) for C<sub>19</sub>H<sub>17</sub>BrN<sub>3</sub>: calculated: 366.06058, found 366.05991 [M<sup>+</sup> + 1].

2-((*E*)-(4-((*E*)-4-methoxystyryl)phenyl)diazenyl)-1-methylpyrrole (**2d**).

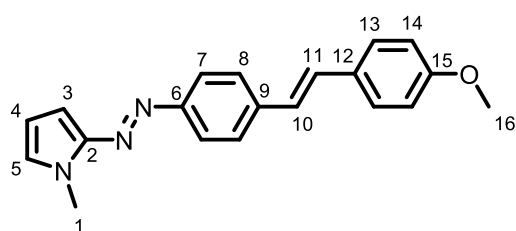

Orange solid. Yield (58%) mp 148 °C decomposition. **IR** (cm<sup>-1</sup>) 1601 (C=C), 3115 (Ar-C-H), 1248 (N=N).

**<sup>1</sup>H NMR** (300 MHz, CDCl<sub>3</sub>, ppm): δ 7.8 (d, *J* = 8.7 Hz, 2H, H8), 7.57 (d, *J* = 8.4 Hz, 2H, H7), 7.48 (d, *J* = 8.7, 2H, H13), 7.14 (d, *J* =

16.5 Hz, 1H, H11), 7.00 (d, *J* = 16.5 Hz, 1H, H10), 6.94 (m, 1H, H5), 6.91 (d, *J* = 9 Hz, 2H, H14), 6.70 (m, 1H, H3), 6.30 (m, 1H, H4), 3.97 (s, 3H, H1), 3.84 (s, 3H, H16). **<sup>13</sup>C**

**NMR** (75 MHz, CDCl<sub>3</sub>, ppm) δ 159.51 (C15), 152.73 (C6), 146.72 (C2), 138.78 (C9), 130.04 (C12), 129.04 (C11), 127.89 (C13), 126.82 (C5 y C7), 126.03 (C10), 122.51 (C8), 114.21 (C14), 110.28 (C4), 99.86 (C3), 55.35 (C16), 33.39 (C1). **EM** (DART<sup>+</sup> *m/z*): 318 [M<sup>+</sup>+1].

**HR-MS** (ESI<sup>+</sup> *m/z*) for C<sub>20</sub>H<sub>20</sub>N<sub>3</sub>O: calculated 318.16061, found 318.15981 [M<sup>+</sup> + 1].

2-((*E*)-(4-((*E*)-2-(ferrocenyl)phenyl)diazenyl)-1-methylpyrrole (**3a**).

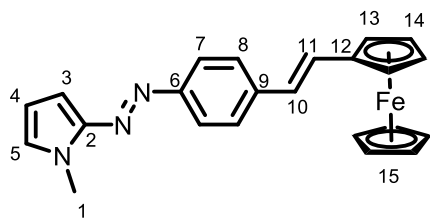

Black solid. Yield (69 %) mp 148 °C decomposition. **IR**

(cm<sup>-1</sup>) 1625 (C=C), 1323 (N=N). **<sup>1</sup>H NMR** (300 MHz,

CDCl<sub>3</sub>, ppm): δ 7.78 (d, *J* = 8.4 Hz, 2H, H8), 7.50 (d, *J* = 8.4 Hz, 2H, H7), 6.95 (d, *J* = 15 Hz, 1H, H11), 6.92 (m,

1H, H5), 6.73 (d,  $J = 15$  Hz, 1H, H10), 6.70 (m, 1H, H3), 6.29 (m, 1H, H4), 4.48 (m, 2H, H13), 4.31 (m, 2H, H14), 4.15 (s, 5H, H15), 3.96 (s, 3H, H1).  $^{13}\text{C NMR}$  (75 MHz,  $\text{CDCl}_3$ , ppm)  $\delta$  152.40 (C6), 146.77 (C2), 139.05 (C9), 128.23 (C11), 126.73 (C5), 126.31 (C7), 125.49 (C10), 122.58 (C8), 110.28 (C4), 99.73 (C3), 83.19 (C12), 69.32 (C14 y C15), 67.05 (C13), 33.43 (C1). **EM** (DART<sup>+</sup>  $m/z$ ): 396 [ $M^+ + 1$ ]. **HR-MS** (ESI<sup>+</sup>  $m/z$ ) for  $\text{C}_{23}\text{H}_{21}\text{FeN}_3$ : calculated 395.108485, found 396.11673 [ $M^+ + 1$ ].

4-((*E*)-4-((*E*)-(1-methyl-1H-pyrrol-2-yl)diazenyl)styryl)pyridine (**3b**).

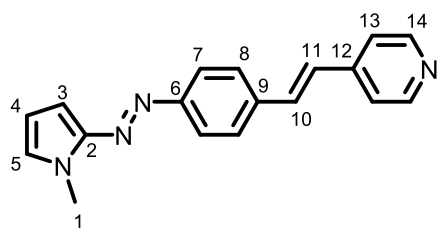

Red solid. Yield (73 %). mp 168 °C. **IR** ( $\text{cm}^{-1}$ ) 1626 (C=C), 1324 (N=N).  $^1\text{H NMR}$  (300 MHz,  $\text{CDCl}_3$ , ppm)  $\delta$  8.59 (d,  $J = 6$  Hz, 2H, H14), 7.83 (d,  $J = 6$  Hz, 2H, H8), 7.62 (d,  $J = 6$  Hz, 2H, H7), 7.38 (d,  $J = 6$  Hz, 2H, H13), 7.34 (d,  $J = 15$  Hz, 1H, H10), 7.07 (d,  $J = 15$  Hz, 1H, H11), 6.96 (m, 1H, H5), 6.74 (m, 1H, H3), 6.32 (m, 1H, H4), 3.97 (s, 3H, H1).  $^{13}\text{C NMR}$  (75 MHz,  $\text{CDCl}_3$ , ppm)  $\delta$  153.71 (C6), 150.25 (C14), 146.74 (C2), 144.49 (C12), 136.95 (C9), 132.56 (C11), 127.73 (C8), 127.43 (C5), 126.52 (C10), 122.56 (C7), 120.88 (C13), 110.56 (C4), 100.43 (C3), 33.47 (C1). **EM** (EI<sup>+</sup>  $m/z$ ): 288 [ $M^+$ ]. **HR-MS** (ESI<sup>+</sup>  $m/z$ ) for  $\text{C}_{18}\text{H}_{16}\text{N}_4$ : calculated 288.137496, found 289.14580 [ $M^+ + 1$ ].

3-((*E*)-4-((*E*)-(1-methyl-1H-pyrrol-2-yl)diazenyl)styryl)pyridine (**3c**).

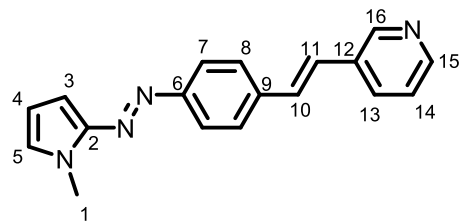

Orange solid. Yield (53%). mp 126 °C. **IR** ( $\text{cm}^{-1}$ ) 1660 (C=C), 1322 (N=N).  $^1\text{H NMR}$  (300 MHz,  $\text{CDCl}_3$ , ppm)  $\delta$  8.76 (s, 1H, H16), 8.52 (m, 1H, H15), 7.85 (m, 3H, H8, H13), 7.63 (d,  $J = 9$  Hz, 2H, H7), 7.32 (m, 1H, H14), 7.23 (d,  $J = 15$  Hz, 1H, H10), 7.14 (d,  $J = 15$  Hz, 1H, H11), 6.97 (s, 1H, H5), 6.76 (m, 1H, H3), 6.33 (m, 1H, H4), 3.99 (s, 3H, H1).  $^{13}\text{C NMR}$  (75 MHz,  $\text{CDCl}_3$ , ppm)  $\delta$  153.35 (C6), 148.69 (C16), 148.65 (C15), 146.71 (C2), 137.53 (C9), 132.91 (C12), 132.70 (C13), 130.20 (C11), 127.33 (C7), 127.24 (C5), 125.50 (C10), 123.60 (C14), 122.55 (C8), 110.46 (C4), 100.25 (C3), 33.45 (C1). **EM** (DART<sup>+</sup>  $m/z$ ): 289 [ $M^+ + 1$ ]. **HR-MS** (ESI<sup>+</sup>  $m/z$ ) for  $\text{C}_{18}\text{H}_{16}\text{N}_4$ : calculated 288.137496, found 289.14442 [ $M^+ + 1$ ].

4-((*E*)-4-((*E*)-(1-methyl-1H-pyrrol-2-yl)diazenyl)styryl)quinoline (**3d**).

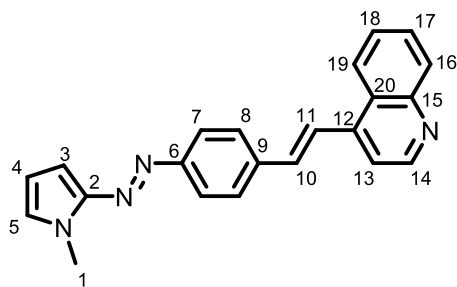

Red solid. Yield (95%). mp 198 °C decomposition. **IR** ( $\text{cm}^{-1}$ ) 1621 (C=C) 1342 (N=N).  **$^1\text{H NMR}$**  (300 MHz,  $\text{CDCl}_3$ , ppm):  $\delta$  8.92 (d,  $J = 5$  Hz, 1H, H14), 8.25 (d,  $J = 8$  Hz, 1H, H16), 8.15 (d,  $J = 8$  Hz, 1H, H19), 7.89 (m, 3H, H8, H11), 7.73 (m, 3H, H7, H17), 7.62 (m, 2H, H13, H18), 7.39 (d,  $J = 15$  Hz, 1H, H10), 6.98 (m, 1H, H5), 6.75 (m, 1H, H3), 6.32 (m, 1H, H5), 3.99 (s, 3H, H1).  **$^{13}\text{C NMR}$**  (75 MHz,  $\text{CDCl}_3$ , ppm)  $\delta$  151.68 (C6), 150.09 (C15), 149.38 (C14), 146.59 (C2), 134.67 (C9), 131.67 (C12), 130.92 (C11), 129.43 (C16), 128.86 (C17), 127.88 (C7), 127.47 (C5), 126.68 (C10), 125.84 (C20), 123.46 (C18), 123.33 (C19), 122.64 (C8), 117.03 (C13), 110.59 (C4), 100.51 (C3), 33.48 (C1). **MS** (DART<sup>+</sup>  $m/z$ ): 339 [ $\text{M}^+ + 1$ ]. **HR-MS** (ESI<sup>+</sup>  $m/z$ ) for  $\text{C}_{22}\text{H}_{19}\text{N}_4$ : calculated 339.16102, found 339.15982 [ $\text{M}^+ + 1$ ].

**Synthesis of compounds 4b-d.** In a 50 mL round-flask were added 0.5 mmol of the compound **3** and 5 equiv of MeI in 10 mL of acetonitrile. The mixture was stirred for 24h yielding a dark red solid. The solvent was eliminated by distillation under vacuo and the remanent solid was washed at least three times with diethyl ether, recovered by decantation.

1-methyl-4-((*E*)-4-((*E*)-(1-methyl-1H-pyrrol-2-yl)diazenyl)styryl) pyridin-1-ium iodide (**4b**).

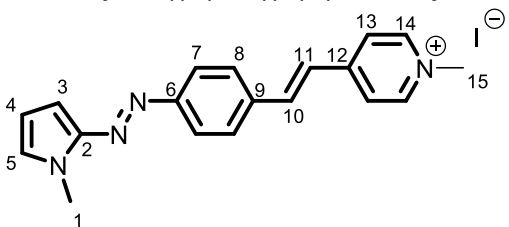

Brown solid. Yield (90 %). mp 180 °C decomposition. **IR** ( $\text{cm}^{-1}$ ) 2999 (C(sp<sup>3</sup>)-H), 1613 (C=C).  **$^1\text{H NMR}$**  (300 MHz,  $(\text{CD}_3)_2\text{SO}$ , ppm)  $\delta$  8.89 (d,  $J = 9$  Hz, 2H, H14), 8.26 (dd,  $J = 9$  Hz, 2H, H13), 8.08 (d,  $J = 15$  Hz, 1H, H10), 7.88 (m, 4H, H7, H8), 7.60 (d,  $J = 15$  Hz, 2H, H11), 7.38 (m, 1H, H5), 6.67 (m, 1H, H3), 6.35 (dd,  $J = 4$  Hz, 1H, H4), 4.27 (s, 3H, H15), 3.96 (s, 3H, H1).  **$^{13}\text{C NMR}$**  (75 MHz,  $(\text{CD}_3)_2\text{SO}$ , ppm)  $\delta$  154.47 (C6), 152.74 (C12), 146.73 (C2), 145.59 (C14), 140.23 (C10), 136.39 (C9), 130.03 (C5), 129.70 (C8), 124.31 (C11), 124.06 (C13), 122.80 (C7), 111.26 (C4), 101.17 (C3), 47.44 (C15), 33.65 (C1). **MS** (FAB<sup>+</sup>  $m/z$ ): 303 [ $\text{M}^+$ ]. **HR-MS** (ESI<sup>+</sup>  $m/z$ ) for  $\text{C}_{19}\text{H}_{19}\text{N}_4$ : calculated 303.16097, found 303.16042 [ $\text{M}^+$ ].



1-methyl-3-((E)-4-((E)-(1-methyl-1H-pyrrol-2-yl)diazenyl)styryl) pyridin-1-ium iodide (**4c**).

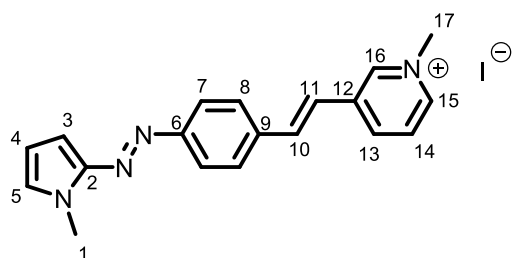

Orange solid. Yield (82%). mp 125 °C. **IR** (cm<sup>-1</sup>) 3000 (C(sp<sup>3</sup>)-H), 1625 (C=C), 1327 (N=N). **<sup>1</sup>H NMR** (300 MHz, (CD<sub>3</sub>)<sub>2</sub>SO, ppm) δ 9.31 (s, 1H, H16), 8.86 (d, *J* = 6 Hz, 1H, H15), 8.78 (d, *J* = 9 Hz, 1H, H13), 8.14 (t, 1H, H14), 7.80 (m, 5H, H7, H8 y H10), 7.49 (d, *J* = 15 Hz, 1H, H11), 7.36 (m, 1H, H5), 6.66 (m, 1H, H3), 6.34 (m, 1H, H4), 4.38 (s, 3H, H17), 3.96 (s, 3H, H1) **<sup>13</sup>C NMR** (75 MHz, (CD<sub>3</sub>)<sub>2</sub>SO, ppm) δ 153.83 (C6), 146.62 (C2), 143.80 (C16), 143.72 (C15), 141.43 (C13), 137.50 (C12), 136.89 (C10), 134.99 (C9), 129.62 (C5), 128.70 (C8), 128.03 (C14), 122.80 (C7), 122.62 (11), 111.06 (C4), 100.83 (C3), 48.59 (C17), 33.62 (C1). **MS** (FAB+ *m/z*): 303 [M<sup>+</sup>]. **HR-MS** (ESI+ *m/z*) for C<sub>19</sub>H<sub>19</sub>N<sub>4</sub>: calculated 303.16097, found 303.16121 [M<sup>+</sup>].

1-methyl-4-((E)-4-((E)-(1-methyl-1H-pyrrol-2-yl)diazenyl)styryl)quinolin-1-ium iodide (**4d**).

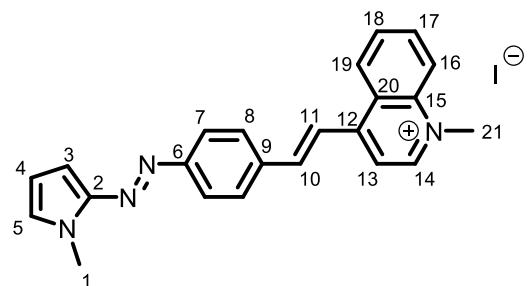

Black solid. Yield (76%). mp 280 °C decomposition. **IR** (cm<sup>-1</sup>) 3005 (C(sp<sup>3</sup>)-H), 1614 (C=C), 1319 (N=N). **<sup>1</sup>H NMR** (300 MHz, (CD<sub>3</sub>)<sub>2</sub>SO, ppm) δ 9.39 (d, *J* = 6 Hz, 1H, H14), 9.09 (d, *J* = 6 Hz, 1H, H16), 8.54 (d, *J* = 6 Hz, 1H, H19), 8.47 (d, *J* = 9 Hz, 1H, H13), 8.40 (d, *J* = 15 Hz, 1H, H11), 8.23 (m, 2H, H10, H17), 8.14 (d, *J* = 9 Hz, 2H, H8), 8.08 (t, 1H, H18), 7.88 (d, *J* = 9 Hz, 2H, H7), 7.39 (m, 1H, H5), 6.68 (m, 1H, H3), 6.36 (m, 1H, H4), 4.56 (s, 3H, H21), 3.97 (s, 3H, H1). **<sup>13</sup>C NMR** (75 MHz, (CD<sub>3</sub>)<sub>2</sub>SO, ppm) δ 154.64 (C6), 152.77 (C12), 148.59 (C14), 146.77 (C2), 142.47 (C10), 139.24 (C15), 136.74 (C9), 135.50 (C17), 130.48 (C8), 130.14 (C5), 129.81 (C18), 127.00 (C20), 126.87 (C16), 122.67 (C7), 120.90 (C11), 119.88 (C13), 116.85 (C19), 111.32 (C4), 101.24 (C3), 45.25 (C21), 33.66 (C1). **MS** (FAB+ *m/z*): 353 [M<sup>+</sup>]. **HR-MS** (ESI+ *m/z*) for C<sub>23</sub>H<sub>21</sub>N<sub>4</sub>: calculated 353.17662, found 353.17747 [M<sup>+</sup>].

# <sup>1</sup>H and <sup>13</sup>C NMR Spectra.

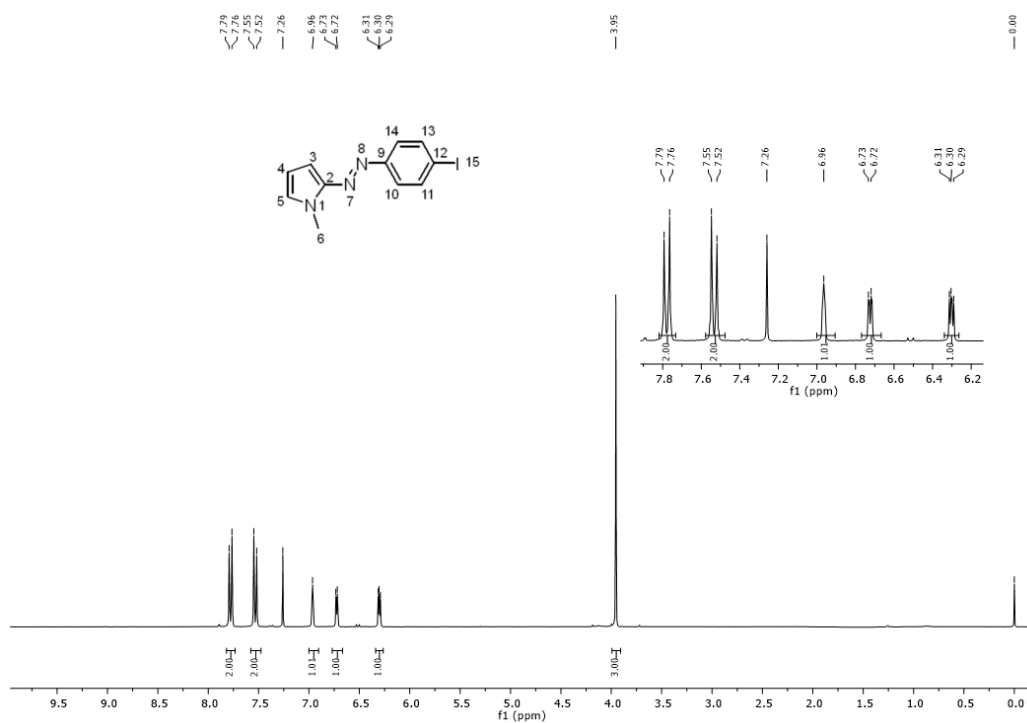

Figure S 1 <sup>1</sup>H NMR spectrum (300 MHz, CDCl<sub>3</sub>) of compound 1a

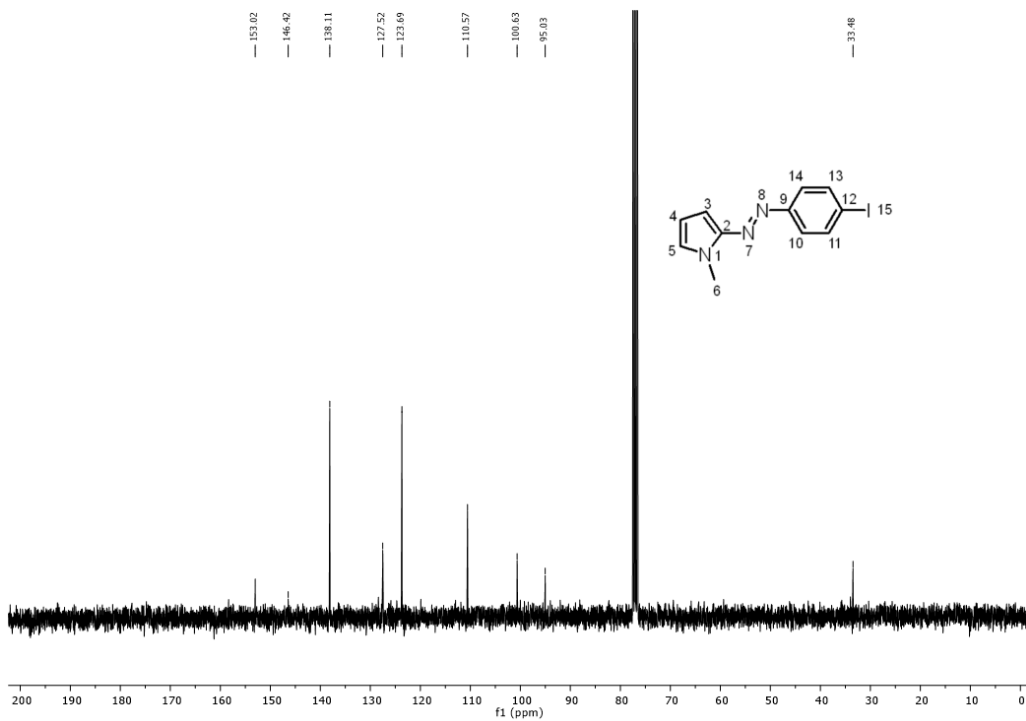

Figure S 2 <sup>13</sup>C NMR spectrum (75 MHz, CDCl<sub>3</sub>) of compound 1a

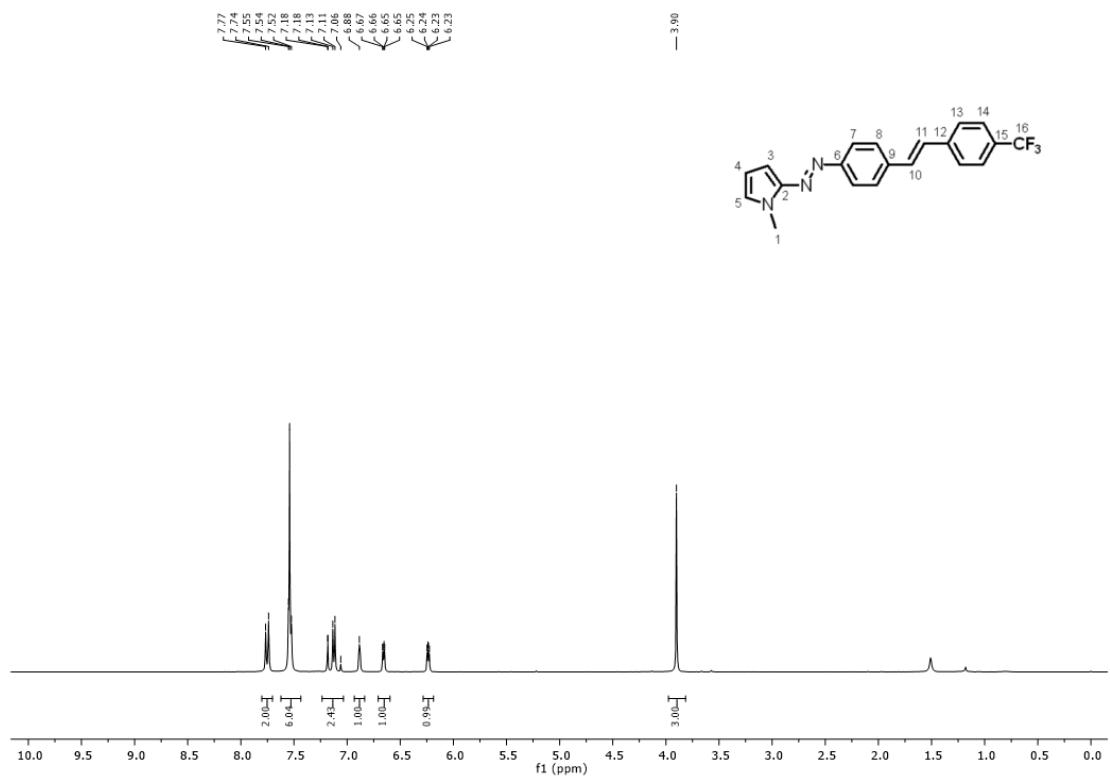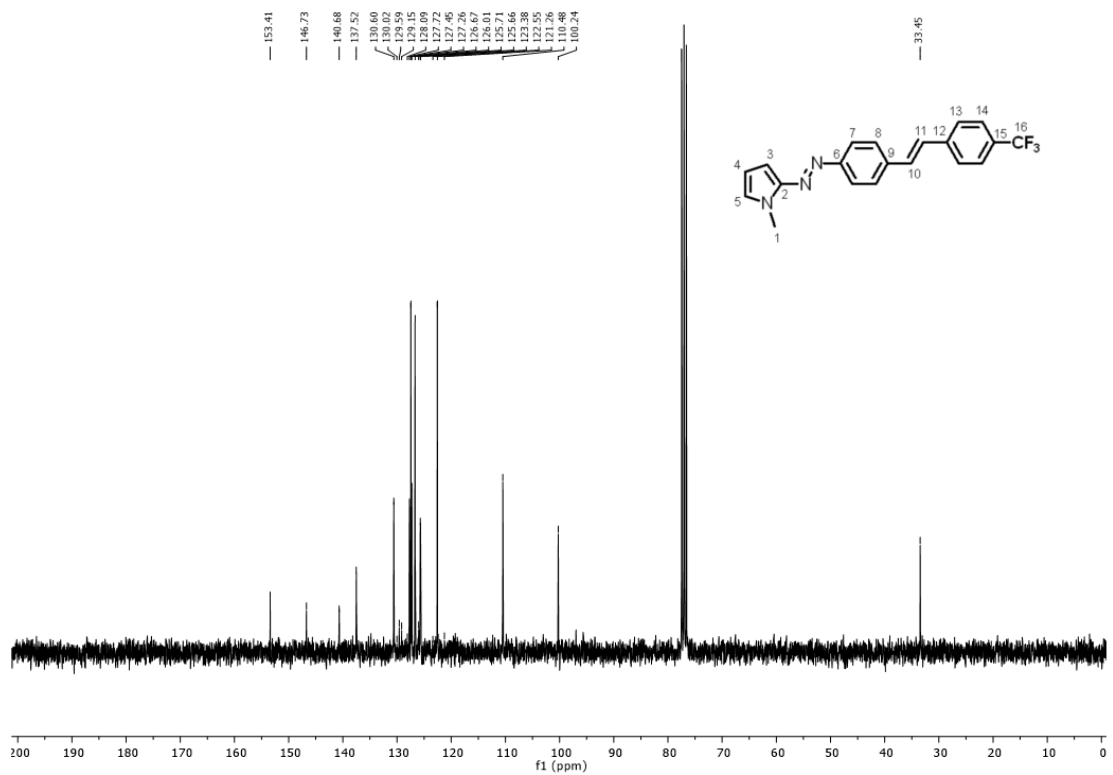

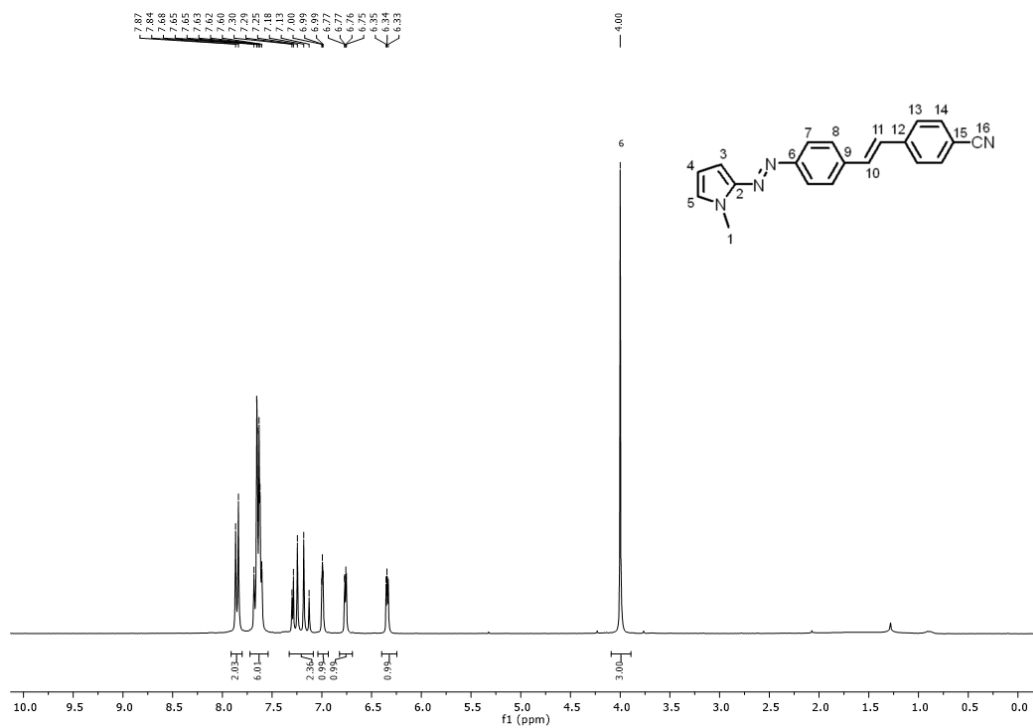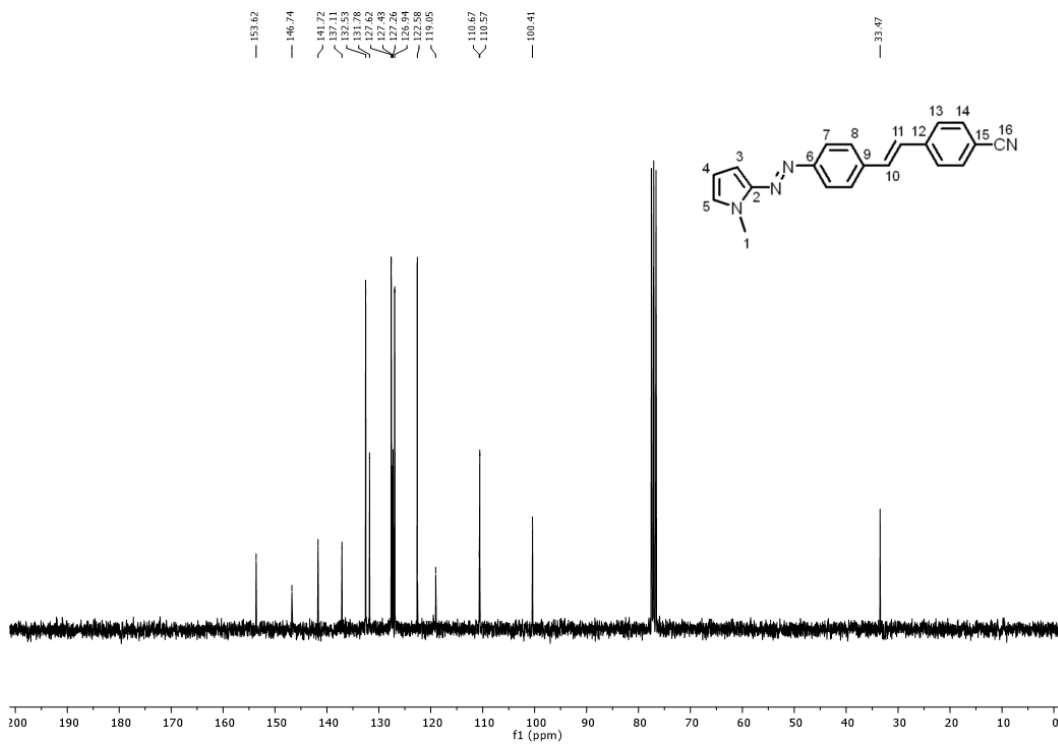

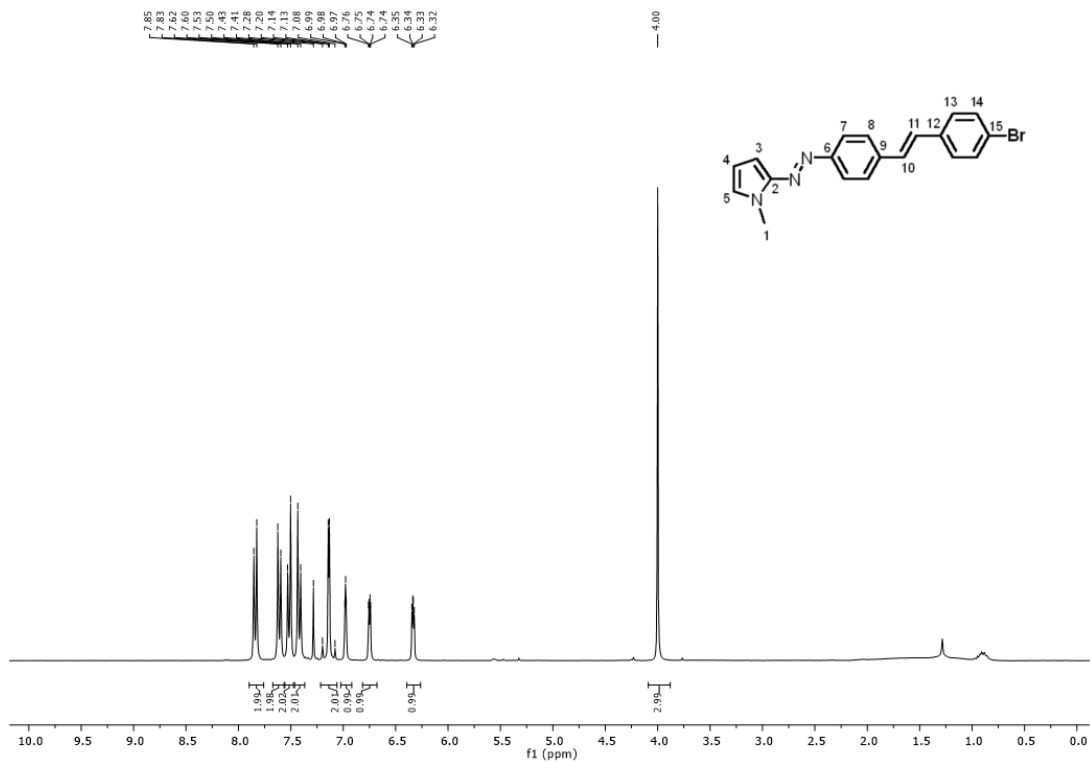

**Figure S 7**  $^1\text{H}$  NMR spectrum (300 MHz,  $\text{CDCl}_3$ ) of compound **2c**

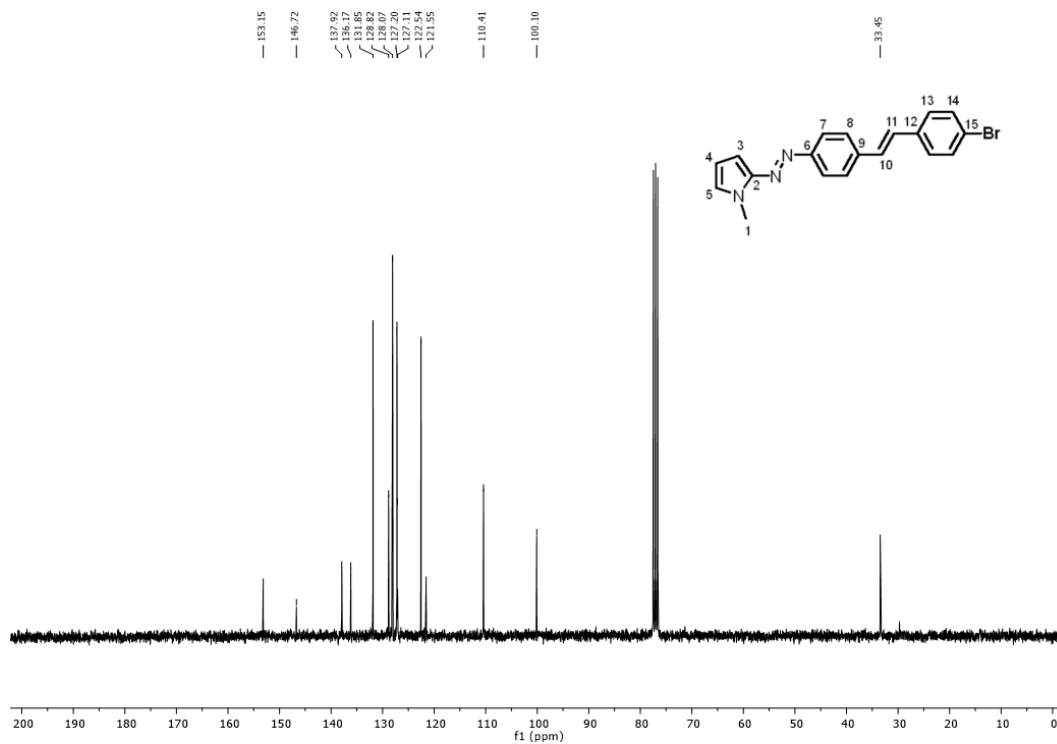

**Figure S 8**  $^{13}\text{C}$  NMR spectrum (75 MHz,  $\text{CDCl}_3$ ) of compound **2c**

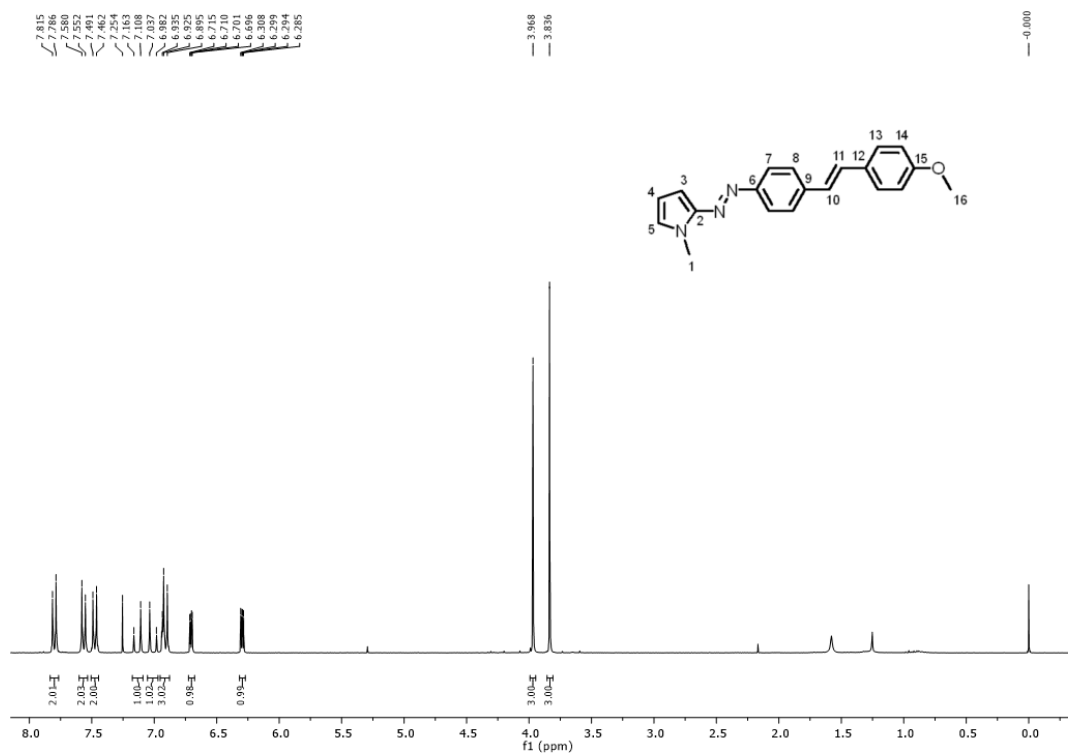

Figure S 9 <sup>1</sup>H NMR spectrum (300 MHz, CDCl<sub>3</sub>) of compound 2d

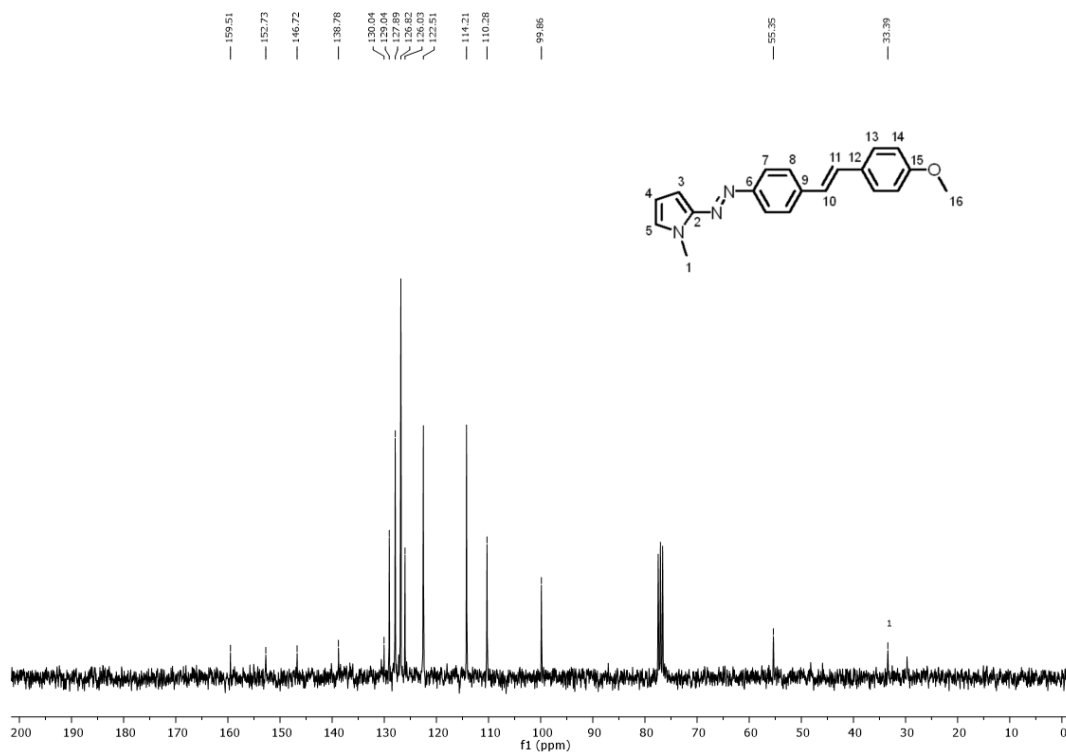

Figure S 10 <sup>13</sup>C NMR spectrum (75 MHz, CDCl<sub>3</sub>) of compound 2d

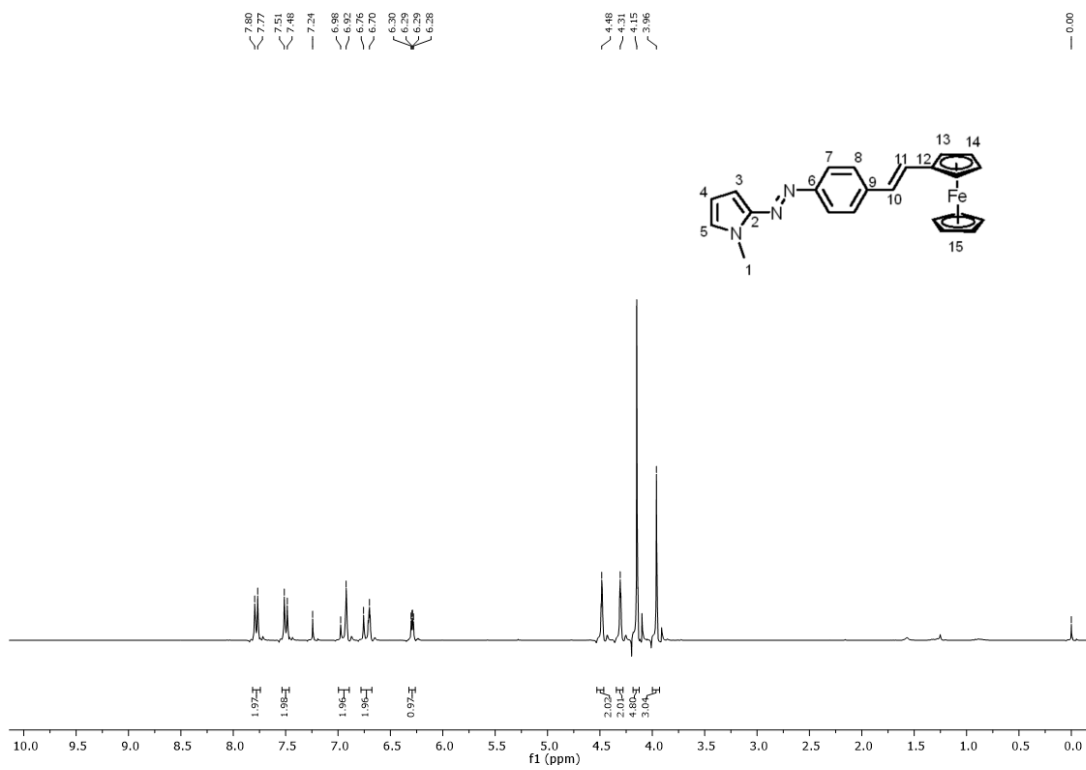

Figure S 11 <sup>1</sup>H NMR spectrum (300 MHz, CDCl<sub>3</sub>) of compound 3a

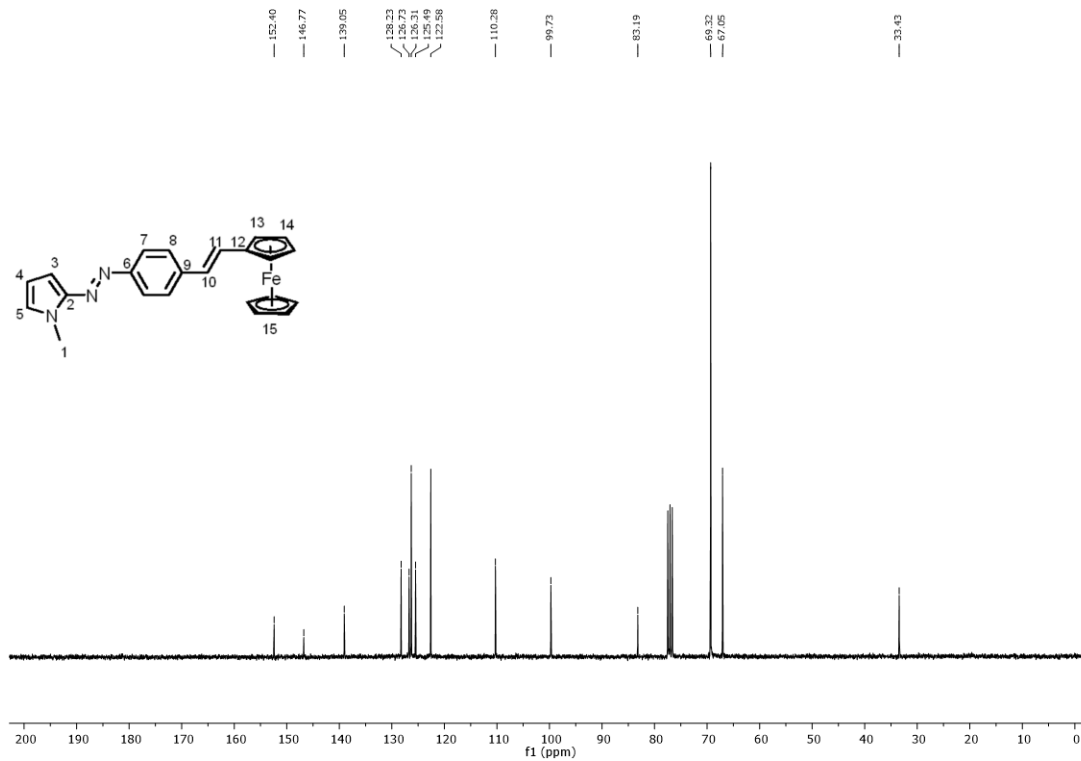

Figure S 12 <sup>13</sup>C NMR spectrum (75 MHz, CDCl<sub>3</sub>) of compound 3a

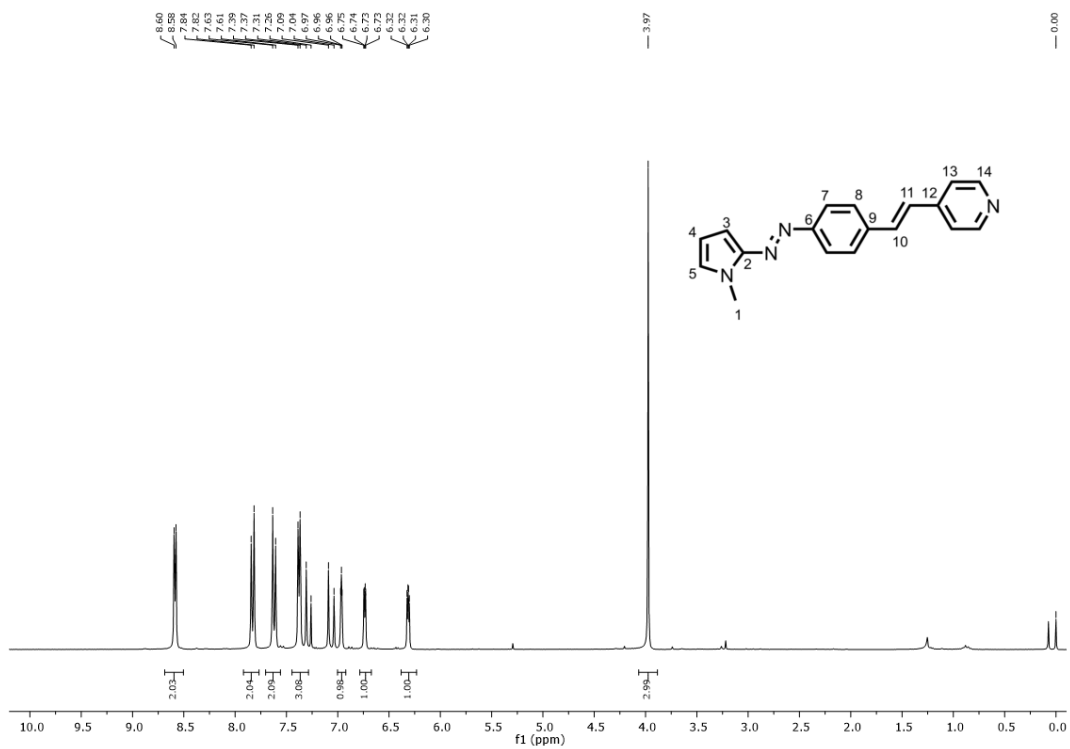

Figure S 13 <sup>1</sup>H NMR spectrum (300 MHz, CDCl<sub>3</sub>) of compound 3b

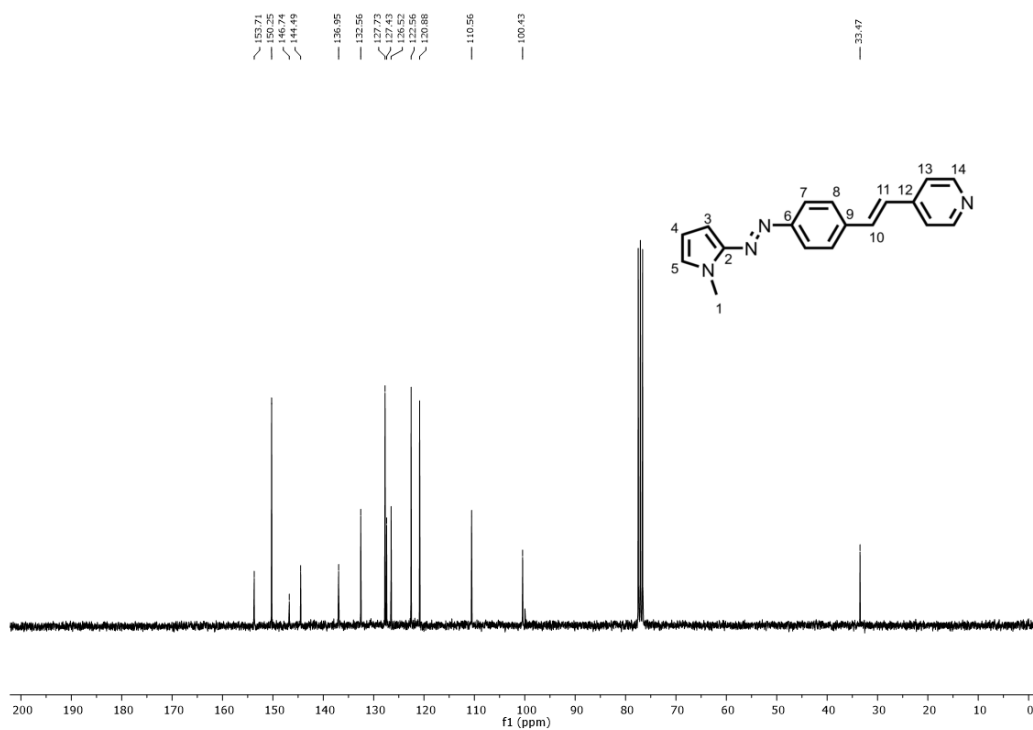

Figure S 14 <sup>13</sup>C NMR spectrum (75 MHz, CDCl<sub>3</sub>) of compound 3b



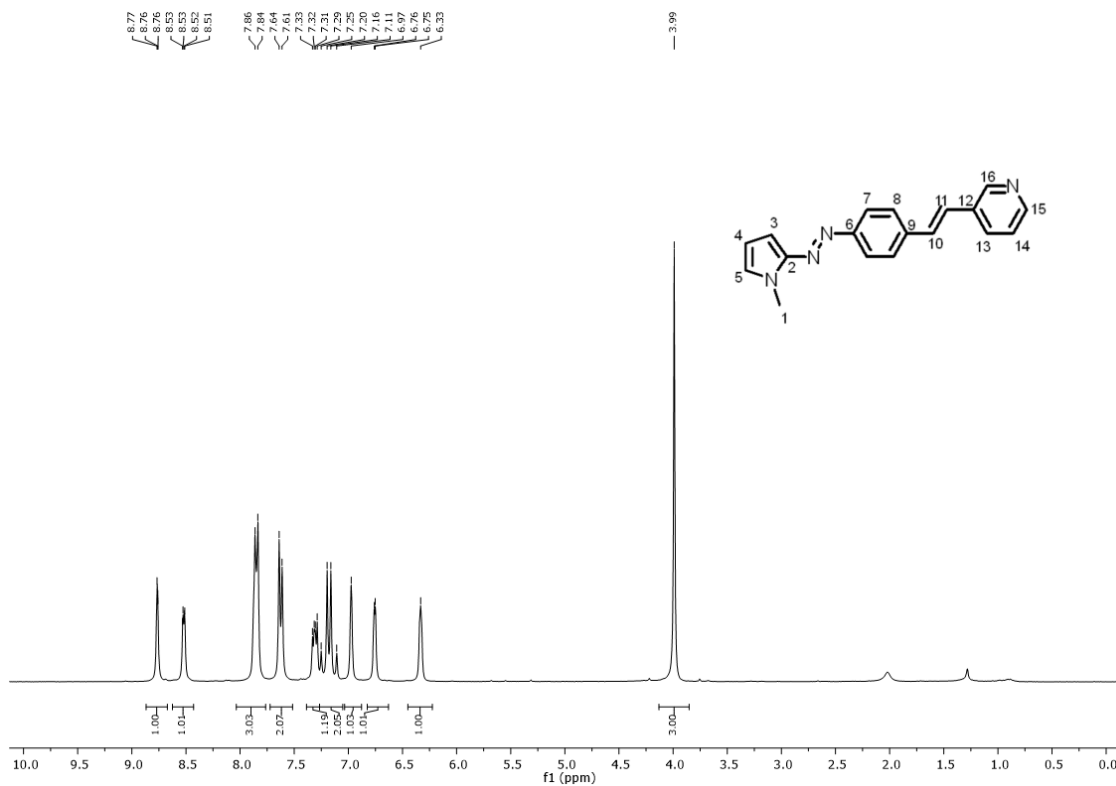

**Figure S 15**  $^1\text{H NMR}$  spectrum (300 MHz,  $\text{CDCl}_3$ ) of compound 3c

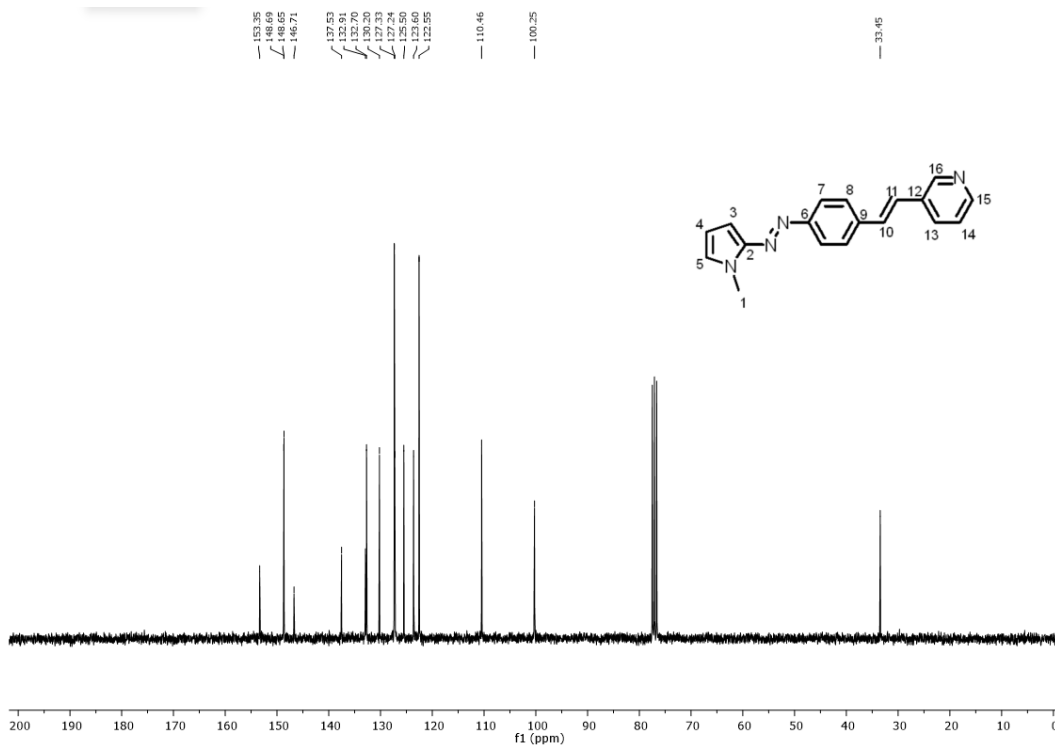

**Figure S 16**  $^{13}\text{C NMR}$  spectrum (75 MHz,  $\text{CDCl}_3$ ) of compound 3c

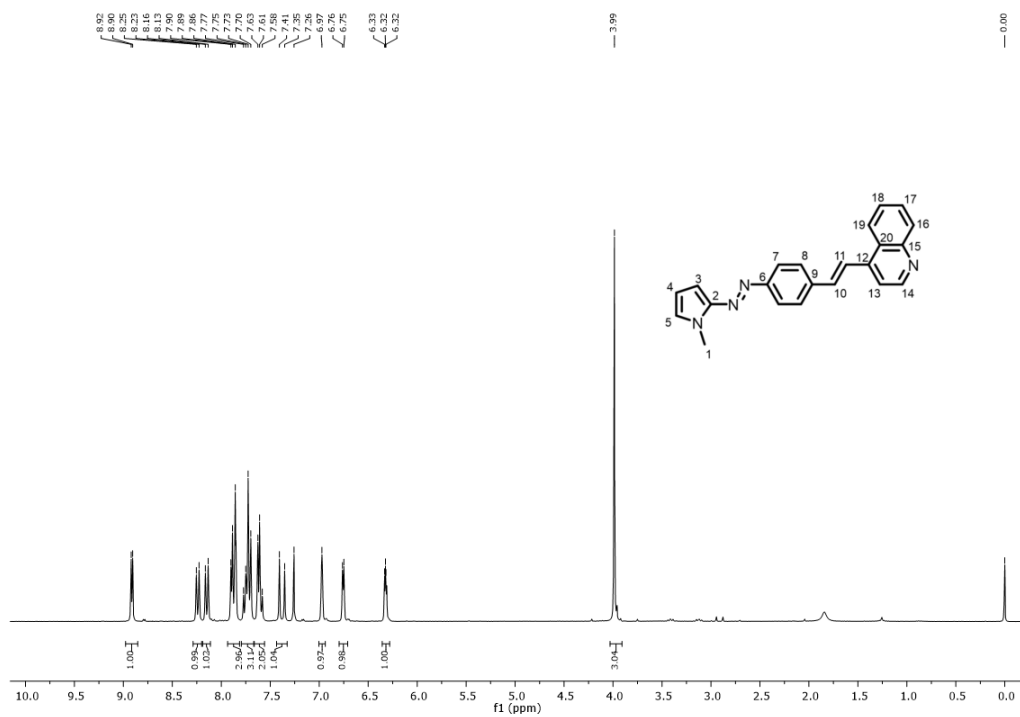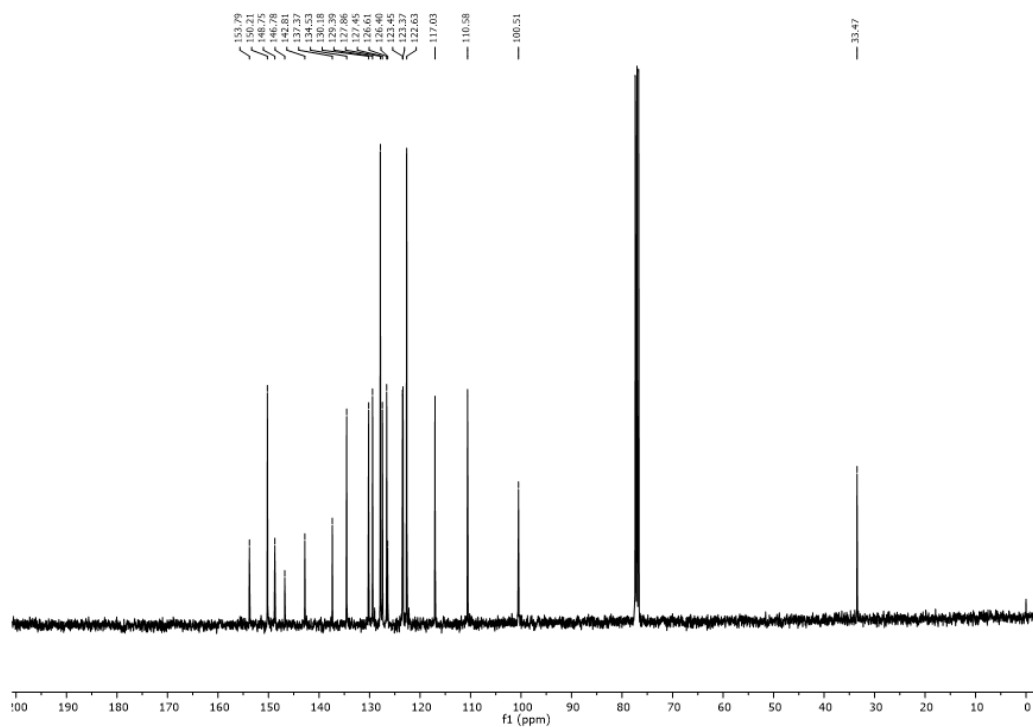

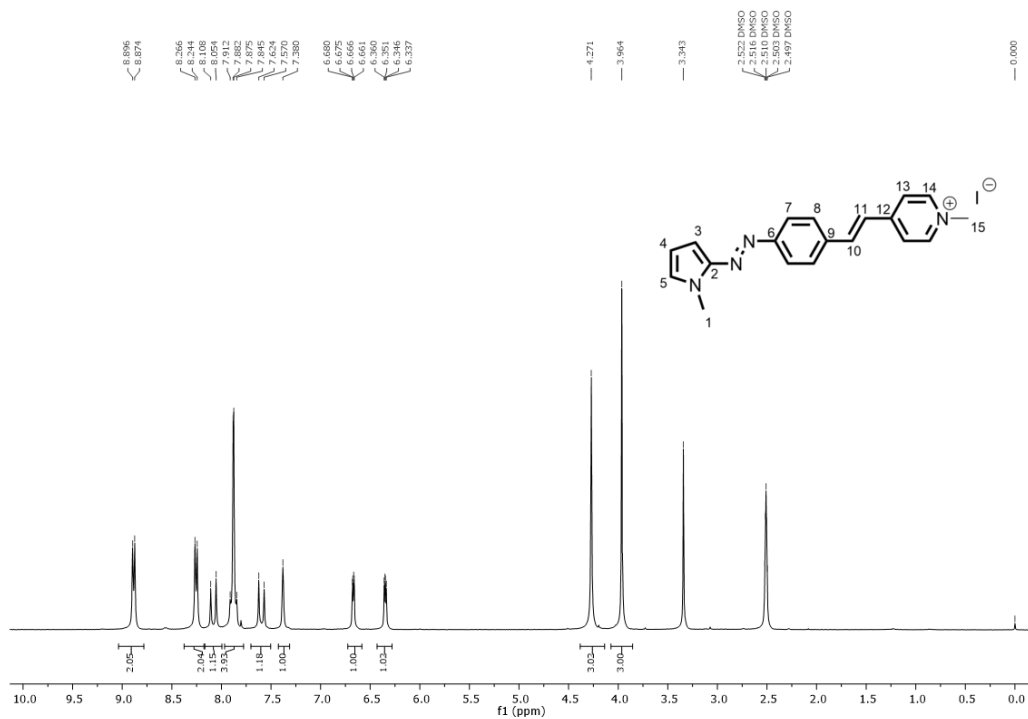

**Figure S 19** <sup>1</sup>H NMR spectrum (300 MHz, DMSO-d<sub>6</sub>) of compound **4b**

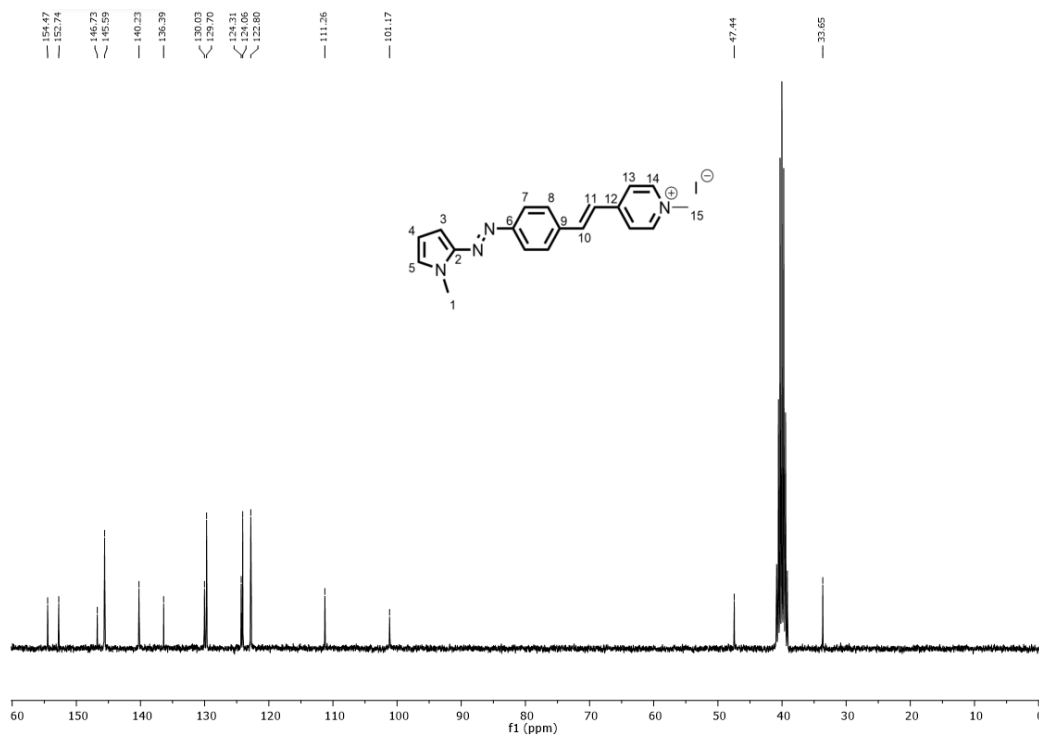

**Figure S 20** <sup>13</sup>C NMR spectrum (75 MHz, CDCl<sub>3</sub>) of compound **4b**

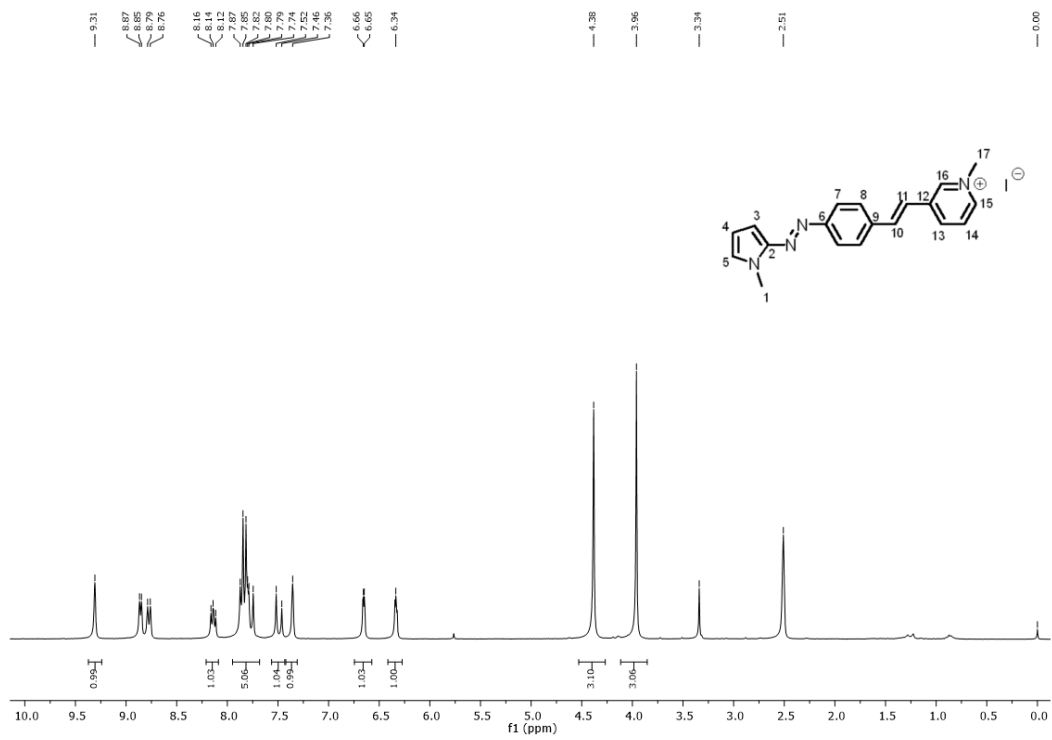

**Figure S 21**  $^1\text{H NMR}$  spectrum (300 MHz,  $\text{DMSO-d}_6$ ) of compound **4c**

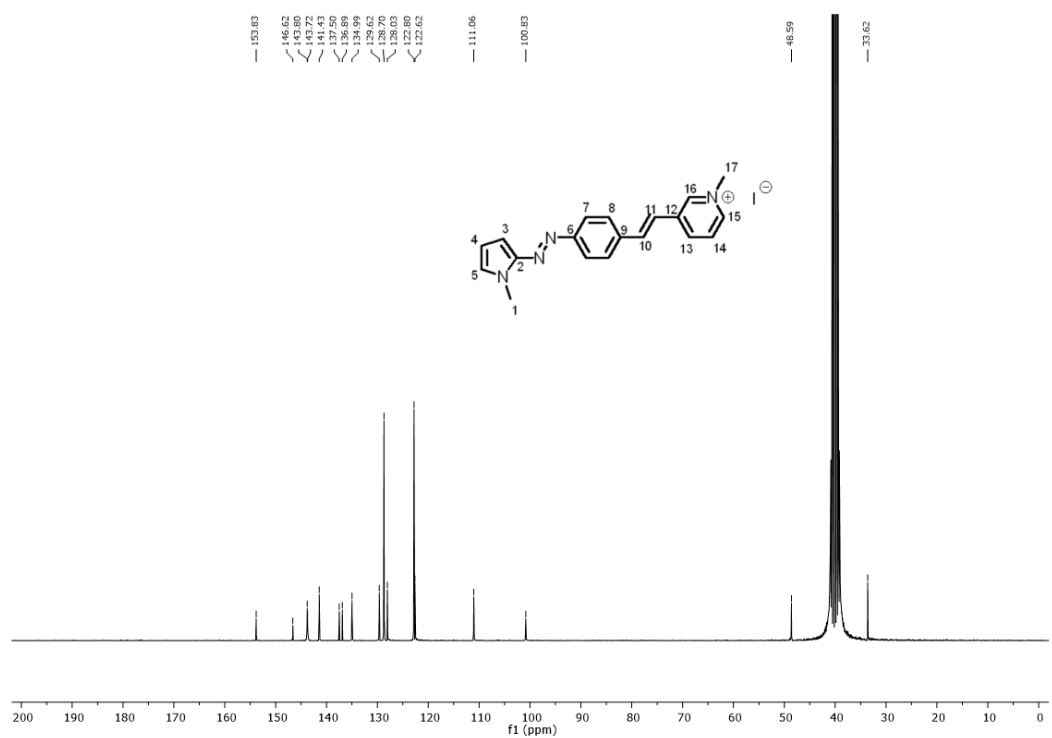

**Figure S 22**  $^{13}\text{C NMR}$  spectrum (75 MHz,  $\text{DMSO-d}_6$ ) of compound **4c**

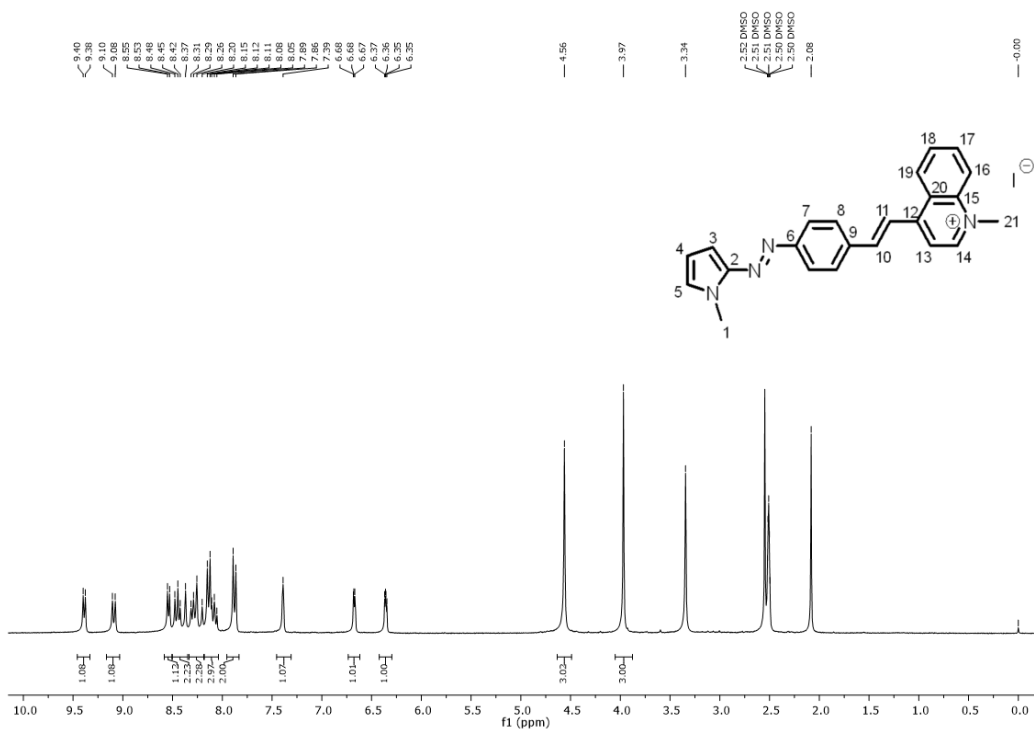

**Figure S 23**  $^1\text{H}$  NMR spectrum (300 MHz,  $\text{DMSO-d}_6$ ) of compound **4d**

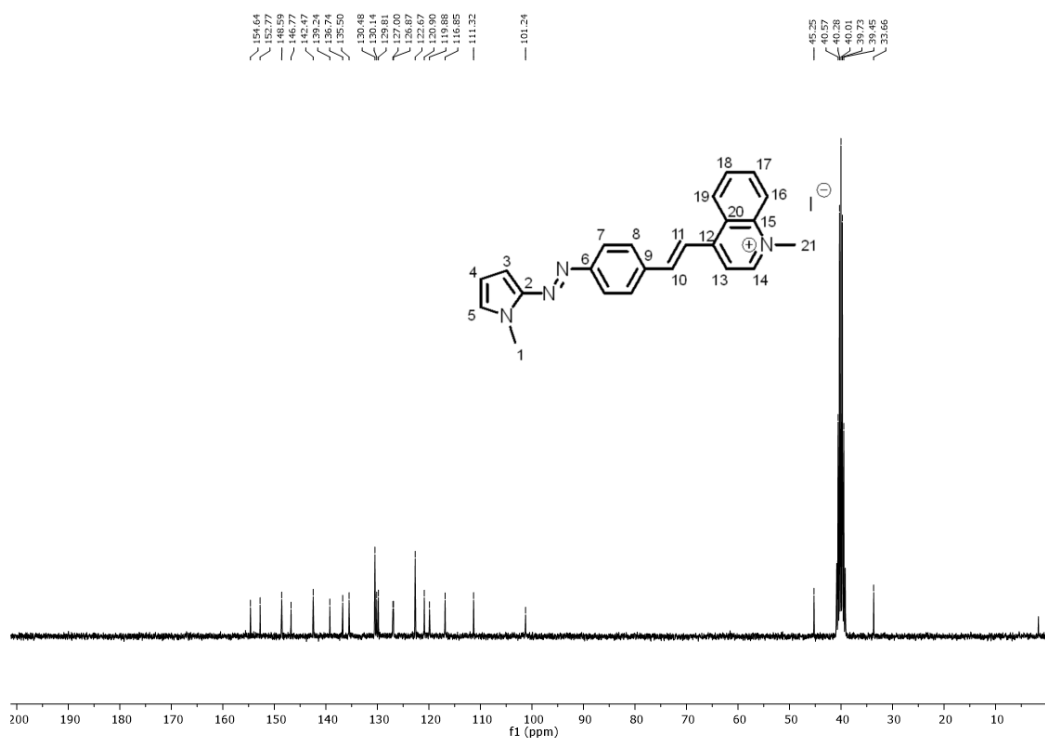

**Figure S 24**  $^{13}\text{C}$  NMR spectrum (75 MHz,  $\text{DMSO-d}_6$ ) of compound **4d**

## 8. Structure determination by X-ray crystallography

Suitable X-ray quality crystals of **3b** were grown by slow evaporation of chloroform at room temperature. Crystals of each compound were mounted on a glass fiber at room temperature, and then placed on a Bruker Smart Apex CCD, equipped with Mo-K  $\alpha$  radiation; decay was negligible in both cases. Details of crystallographic data collected for this compound are provided Table S1. Systematic absences and intensity statistics were used in space group determination. The structure was solved using direct methods.<sup>iv</sup> Anisotropic structure refinements were achieved using full matrix, least-squares technique on all nonhydrogen atoms. All hydrogen atoms were placed in idealized positions, based on hybridization, with isotropic thermal parameters fixed at 1.2 times the value of the attached atom. Structure solutions and refinements were performed using SHELXTL V6.10.<sup>v</sup>

Table S1. X-ray Data Collection and Structure Refinement Details for **3b**

| Compound                                                         | <b>3b</b>                                           |
|------------------------------------------------------------------|-----------------------------------------------------|
| Empirical formula                                                | C <sub>18</sub> H <sub>16</sub> N <sub>4</sub>      |
| Formula weight (g mol <sup>-1</sup> )                            | 288.35                                              |
| Crystal size (nm)                                                | 0.41 x 0.27 x 0.096                                 |
| Color                                                            | Orange                                              |
| Crystal system                                                   | Monoclinic                                          |
| Space group                                                      | <i>P</i> -2 <sub>1</sub>                            |
| <i>a</i> (Å)                                                     | 11.0543(16)                                         |
| <i>b</i> (Å)                                                     | 7.6061(11)                                          |
| <i>c</i> (Å)                                                     | 18.348(3)                                           |
| $\alpha$ (°)                                                     | 90                                                  |
| $\beta$ (°)                                                      | 97.582(3)                                           |
| $\gamma$ (°)                                                     | 90                                                  |
| <i>V</i> (Å <sup>3</sup> )                                       | 1529.3(4)                                           |
| <i>Z</i>                                                         | 4                                                   |
| Temperature (°K)                                                 | 298                                                 |
| <i>D</i> <sub>calc</sub> (g/cm <sup>3</sup> )                    | 1.252                                               |
| Number of collected reflections                                  | 27079                                               |
| Number of independent reflections<br>( <i>R</i> <sub>int</sub> ) | 8576, <i>R</i> <sub>int</sub> = 0.0683              |
| Maximum and minimum transmission                                 | 0.898 and 0.609                                     |
| Data/parameters                                                  | 8576 / 400                                          |
| Final <i>R</i> indices                                           | <i>R</i> = 0.0604                                   |
| [ <i>I</i> > 2σ( <i>I</i> )]                                     | w <i>R</i> <sub>2</sub> = 0.1570                    |
| <i>R</i> indices (all data)                                      | <i>R</i> = 0.1417, w <i>R</i> <sub>2</sub> = 0.1186 |
| GoF( <i>F</i> <sup>2</sup> )                                     | 1.000                                               |
| Absorption correction method                                     | Multi-scan                                          |

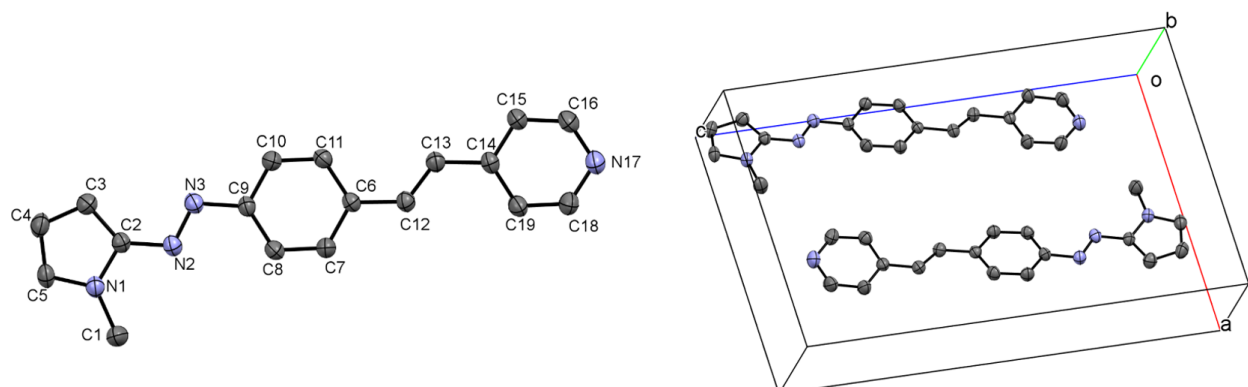

**Figure S 25** ORTEP view of **3b** with thermal ellipsoids at 30% probability level. Selected bond lengths (Å) and angles (°): N(1)-C(1) 1.452(4), N(1)-C(2) 1.378(3), N(1)-C(5) 1.350(4), N(2)-N(3) 1.273(3), N(2)-C(2) 1.385(3), N(3)-C(9) 1.419(3), C(2)-C(3) 1.375(4), C(3)-C(4) 1.383(4), C(4)-C(5) 1.365(4), C(6)-C(12) 1.461(3), C(12)-C(13) 1.321(3), C(13)-C(14) 1.467(4), C(14)-C(15) 1.380(3), C(14)-C(19) 1.391(3), C(15)-C(16) 1.381(4), C(16)-N(17) 1.322(4), N(17)-C(18) 1.323(4), C(18)-C(19) 1.367(4).

## X. UV-Visible studies

### X.1 UV-Visible studies of compound **2a**

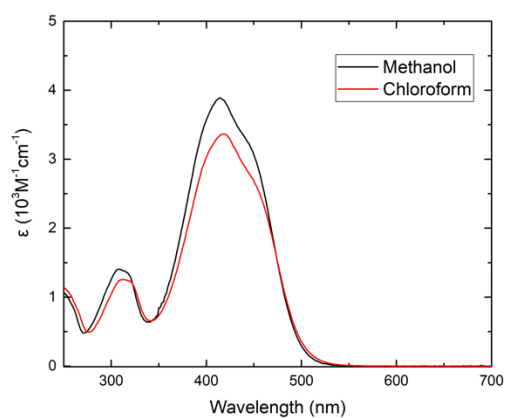

**Figure S 26** UV-Visible spectra of compound **2a** in different solvents.

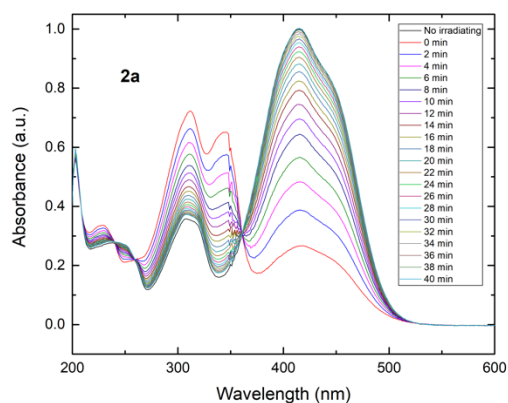

**Figure S 27** UV-vis spectra for **2a** ( $2.5 \times 10^{-5} \text{M}$ , MeOH) after white light irradiation (PSS) and cis-trans return.

| Compound                                                                                                                        | Methanol                                           | Chloroform                                         |
|---------------------------------------------------------------------------------------------------------------------------------|----------------------------------------------------|----------------------------------------------------|
| 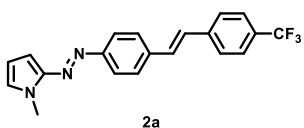 <p style="text-align: center;"><b>2a</b></p> | $\lambda_{\text{max}} = 415$<br>$\epsilon = 39381$ | $\lambda_{\text{max}} = 419$<br>$\epsilon = 33677$ |

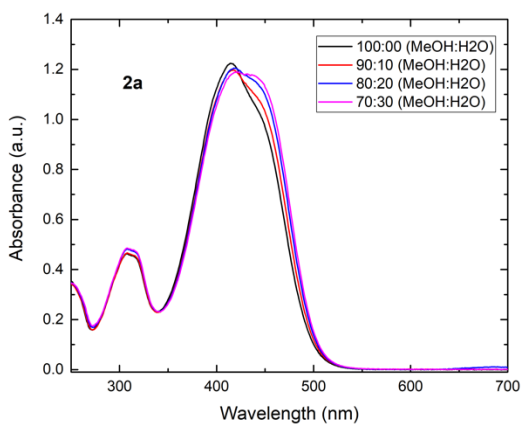

**Figure S 28** UV-visible spectra of compound **2a** in different ratios MeOH/H<sub>2</sub>O.

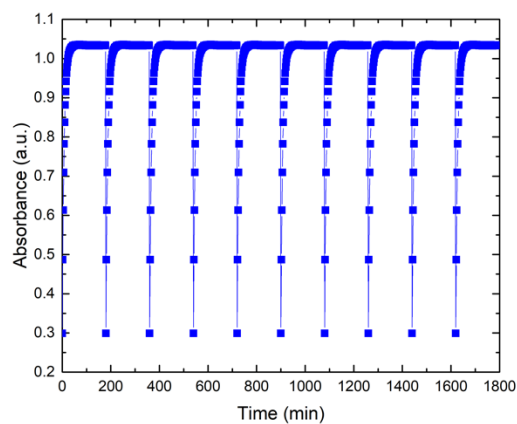

**Figure S 29** **2a** was irradiated ten times for 2 minutes.



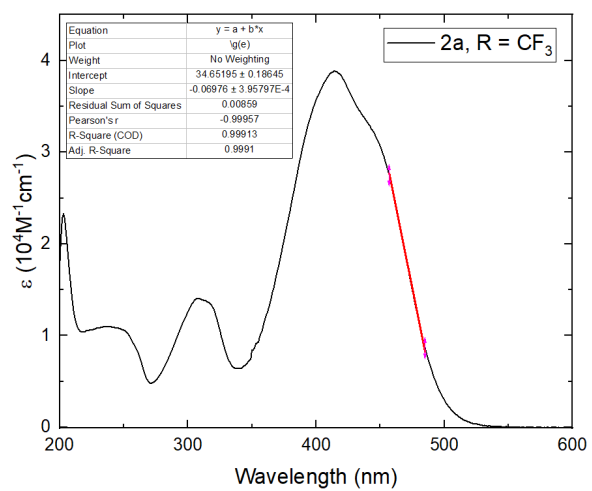

**Figure S30.** Estimation of Optical GAP for **2a**

### X.1 UV-Visible studies of compound **2b**

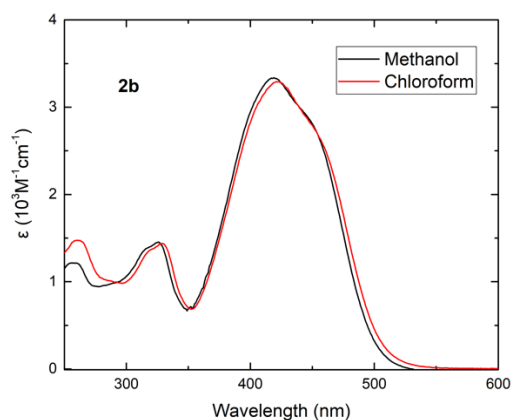

**Figure S 31** UV-Visible spectra of compound **2b** in different solvents.

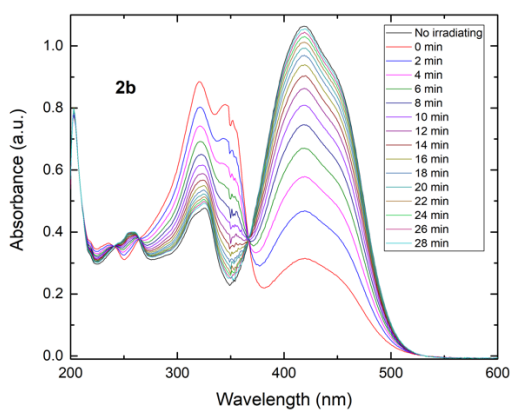

**Figure S 32** UV-vis spectra for **2b** ( $3.1 \times 10^{-5} \text{M}$ , MeOH) after white light irradiation (PSS) and cis-trans return.

| Compound                                     | Methanol                                           | Chloroform                                         |
|----------------------------------------------|----------------------------------------------------|----------------------------------------------------|
| <p style="text-align: center;"><b>2b</b></p> | $\lambda_{\text{max}} = 419$<br>$\epsilon = 34210$ | $\lambda_{\text{max}} = 423$<br>$\epsilon = 33059$ |

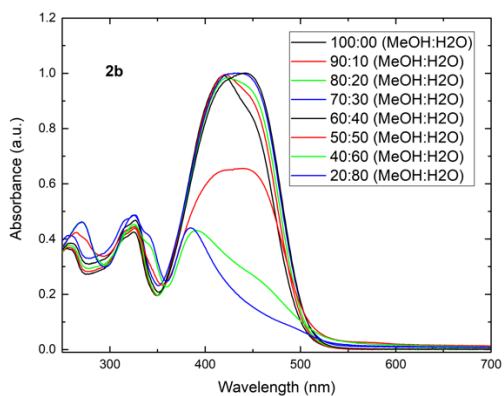

**Figure S 33** UV-visible spectra of compound **2b** in different ratios MeOH/H<sub>2</sub>O.

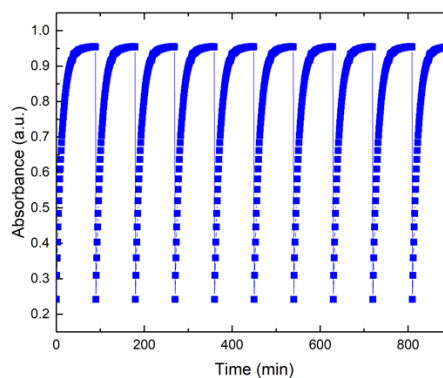

**Figure S 34** **2b** was irradiated ten times for 2 minutes.

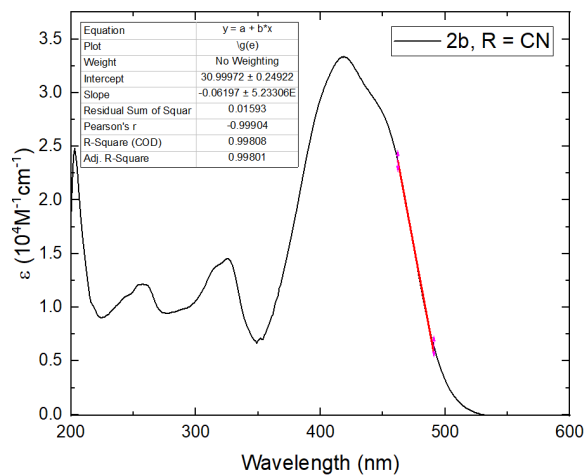

**Figure S35.** Estimation of Optical GAP for **2b**

## X.1 UV-Visible studies of compound **2c**

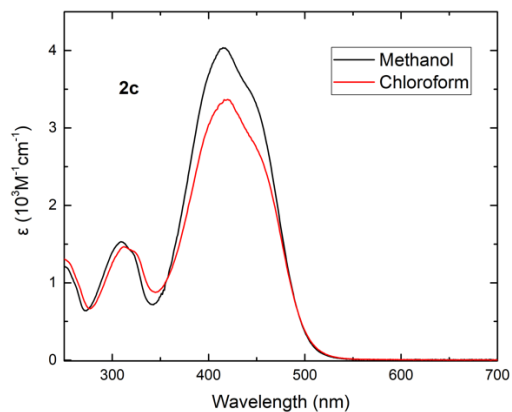

**Figure S 36** UV-Visible spectra of compound **2c** in different solvents.

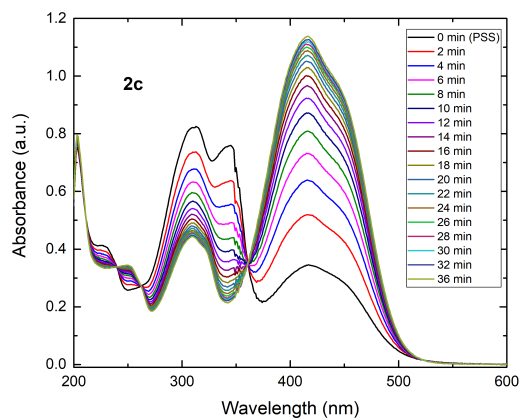

**Figure S 37** UV-vis spectra for **2c** ( $2.8 \times 10^{-5} \text{M}$ , MeOH) after white light irradiation (PSS) and cis-trans return.

| Compound         | Methanol                                          | Chloroform                                        |
|------------------|---------------------------------------------------|---------------------------------------------------|
| <p><b>2c</b></p> | $\lambda \text{ max} = 415$<br>$\epsilon = 40787$ | $\lambda \text{ max} = 420$<br>$\epsilon = 35366$ |

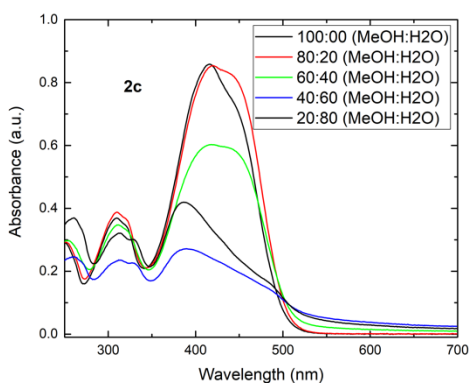

**Figure S 38** UV-visible spectra of compound **2c** in different ratios MeOH/H<sub>2</sub>O.

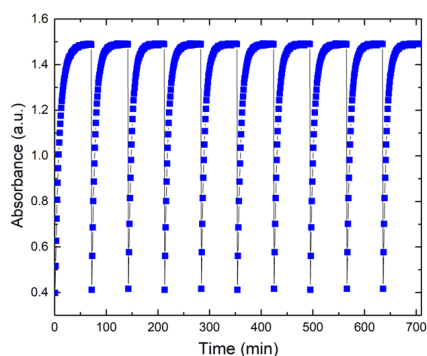

**Figure S 39** **2c** was irradiated ten times for 2 minutes.

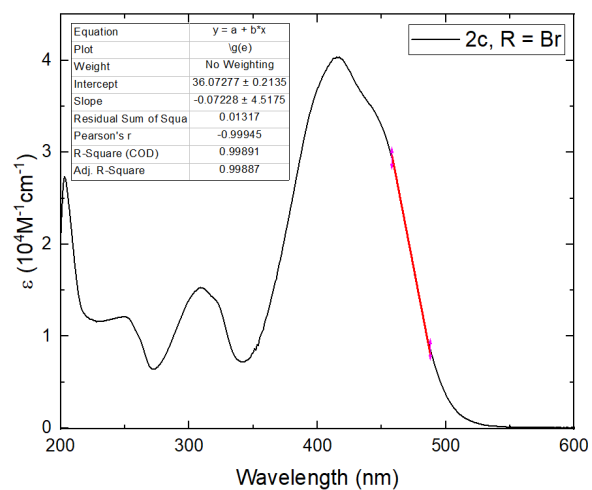

**Figure S 40.** Estimation of Optical GAP for **2c**.

## X.1 UV-Visible studies of compound **2d**

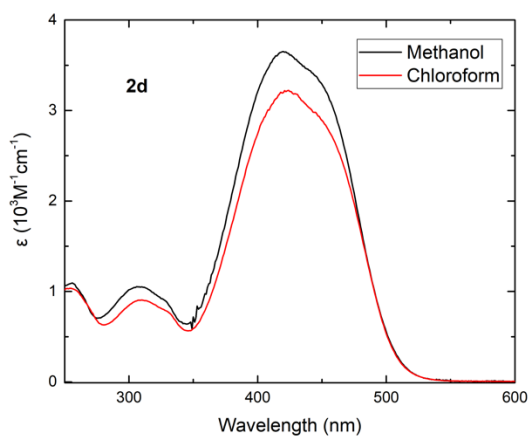

**Figure S 41** UV-Visible spectra of compound **2d** in different solvents.

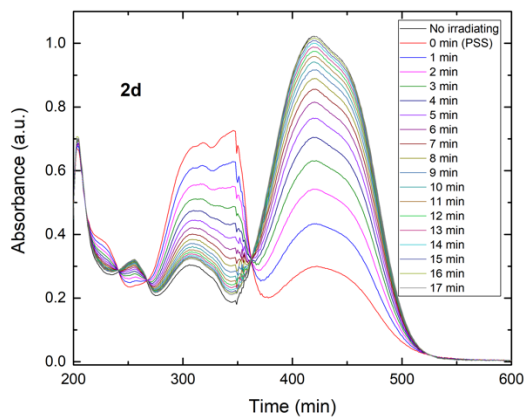

**Figure S 42** UV-vis spectra for **2d** ( $2.7 \times 10^{-5} \text{M}$ , MeOH) after white light irradiation (PSS) and cis-trans return.

| Compound                                     | Methanol                                           | Chloroform                                         |
|----------------------------------------------|----------------------------------------------------|----------------------------------------------------|
| <p style="text-align: center;"><b>2d</b></p> | $\lambda_{\text{max}} = 421$<br>$\epsilon = 37326$ | $\lambda_{\text{max}} = 424$<br>$\epsilon = 32511$ |

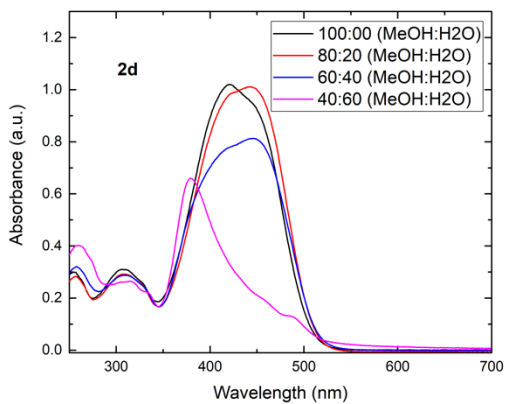

**Figure S 43** UV-visible spectra of compound **2d** in different ratios MeOH/H<sub>2</sub>O.

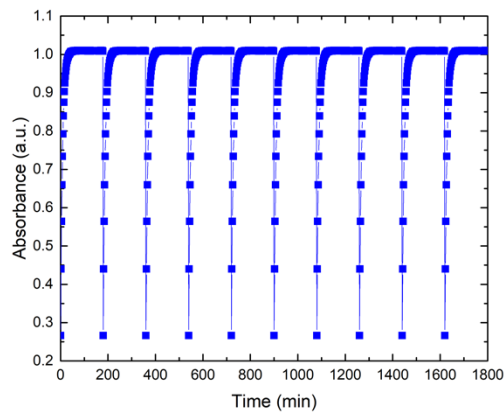

**Figure S 44** **2d** was irradiated ten times for 2 minutes.

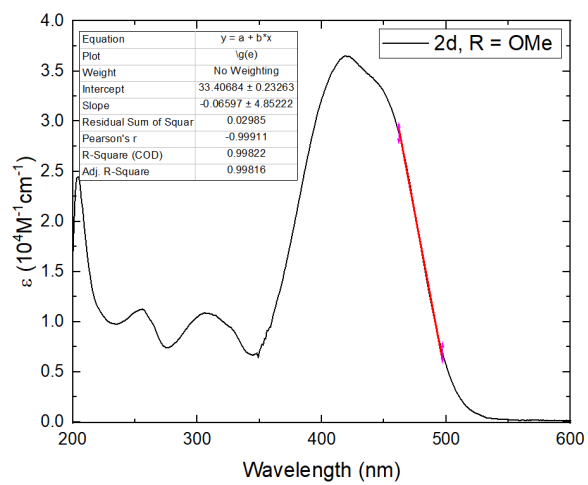

**Figure S 45.** Estimation of Optical GAP for **2d**.

## X.1 UV-Visible studies of compound **3a**

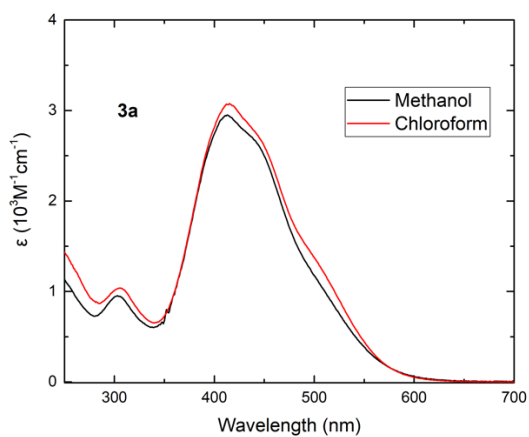

**Figure S 46** UV-Visible spectra of compound **3a** in different solvents.

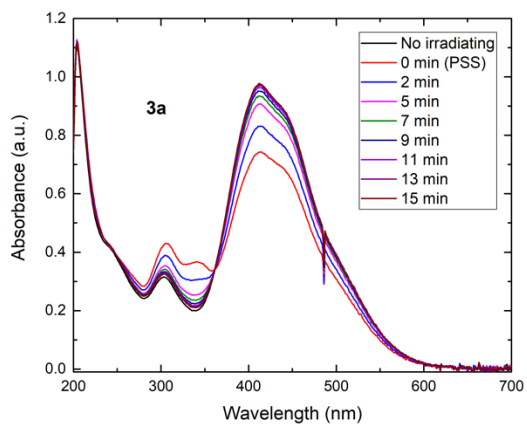

**Figure S 47** UV-vis spectra for **3a** ( $3.2 \times 10^{-5} \text{M}$ , MeOH) after white light irradiation (PSS) and cis-trans return.

| Compound      | Methanol                                          | Chloroform                                        |
|---------------|---------------------------------------------------|---------------------------------------------------|
| <br><b>3a</b> | $\lambda \text{ max} = 413$<br>$\epsilon = 30038$ | $\lambda \text{ max} = 415$<br>$\epsilon = 31226$ |

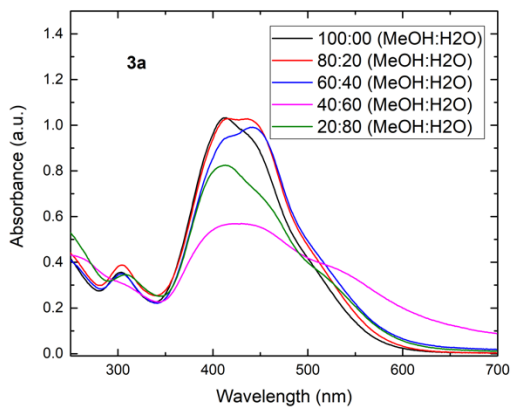

**Figure S 48** UV-visible spectra of compound **3a** in different ratios MeOH/H<sub>2</sub>O.

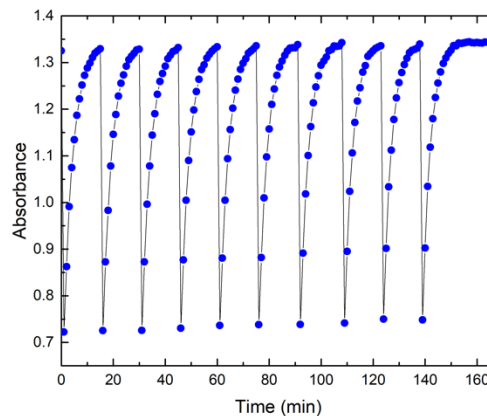

**Figure S 49** **3a** was irradiated ten times for 2 minutes



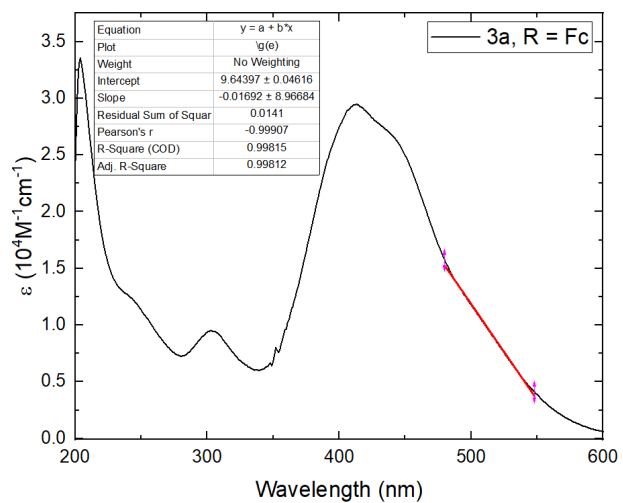

**Figure S 50.** Estimation of Optical GAP for **3a**

## X.1 UV-Visible studies of compound 3b

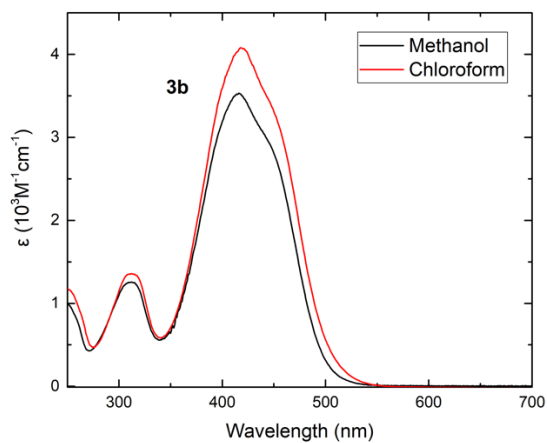

**Figure S 51** UV-Visible spectra of compound **3b** in different solvents.

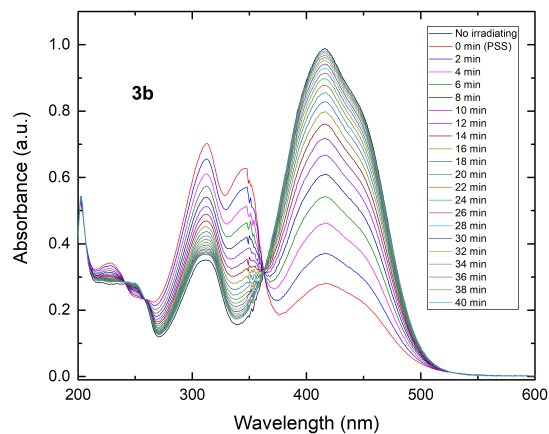

**Figure S 52** UV-vis spectra for **3b** ( $2.7 \times 10^{-5} \text{M}$ , MeOH) after white light irradiation (PSS) and cis-trans return.

| Compound                                     | Methanol                                           | Chloroform                                         |
|----------------------------------------------|----------------------------------------------------|----------------------------------------------------|
| <p style="text-align: center;"><b>3b</b></p> | $\lambda_{\text{max}} = 416$<br>$\epsilon = 36146$ | $\lambda_{\text{max}} = 418$<br>$\epsilon = 41052$ |

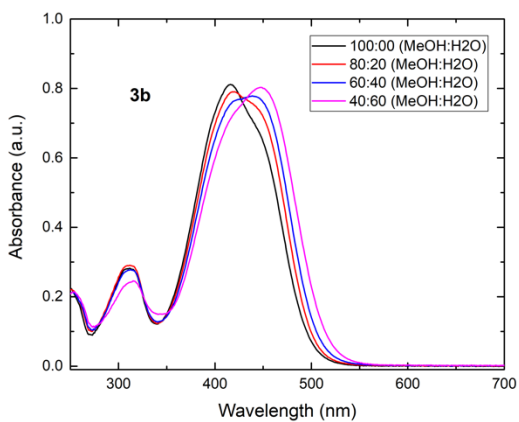

**Figure S 53** UV-visible spectra of compound **3b** in different ratios MeOH/H<sub>2</sub>O.

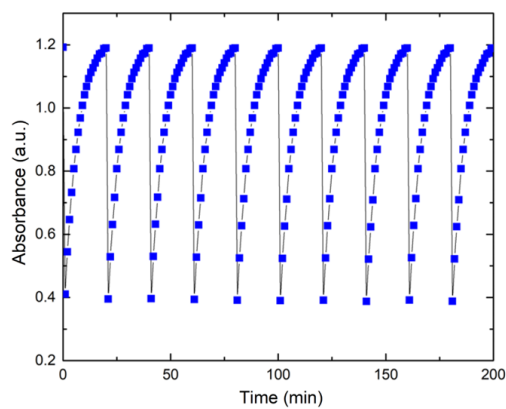

**Figure S 54** **3b** was irradiated ten times for 2 minutes

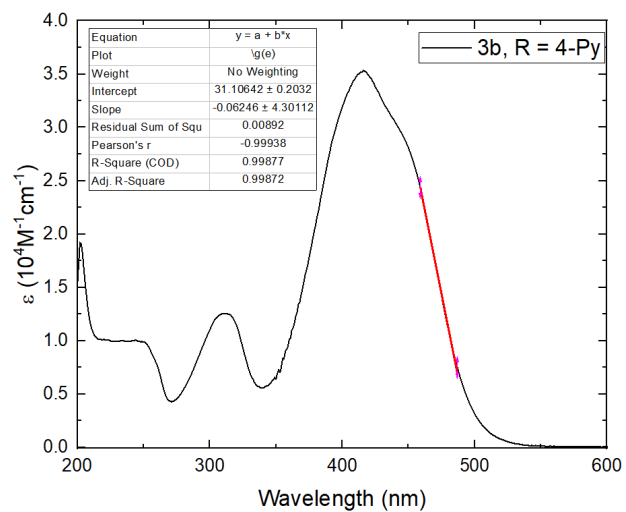

**Figure S 55.** Estimation of Optical GAP for **3b**

### X.1 UV-Visible studies of compound **3c**

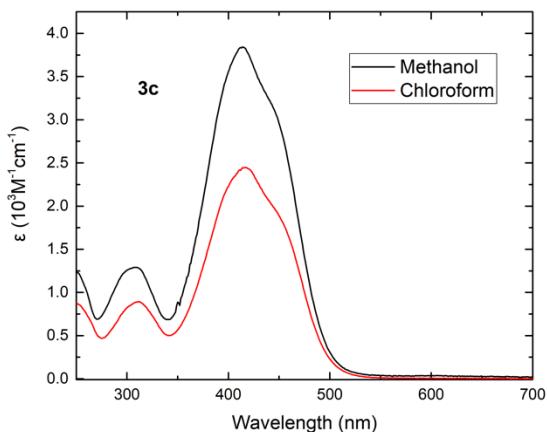

**Figure S 56** UV-Visible spectra of compound **3c** in different solvents.

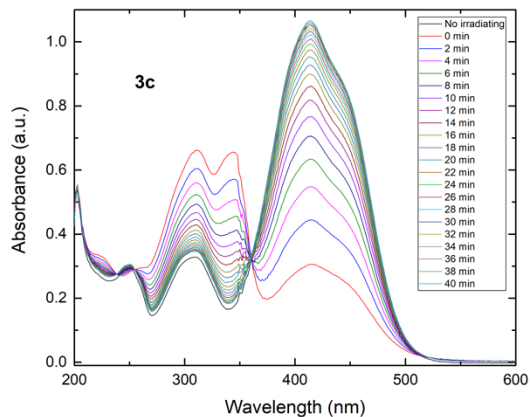

**Figure S 57** UV-vis spectra for **3c** ( $2.7 \times 10^{-5} \text{M}$ , MeOH) after white light irradiation (PSS) and cis-trans return.

| Compound         | Methanol                                           | Chloroform                                         |
|------------------|----------------------------------------------------|----------------------------------------------------|
| <p><b>3c</b></p> | $\lambda_{\text{max}} = 416$<br>$\epsilon = 39100$ | $\lambda_{\text{max}} = 417$<br>$\epsilon = 25315$ |

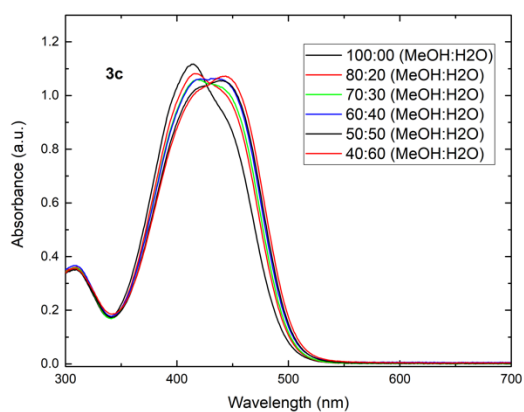

**Figure S 58** UV-visible spectra of compound **3c** in different ratios MeOH/H<sub>2</sub>O.

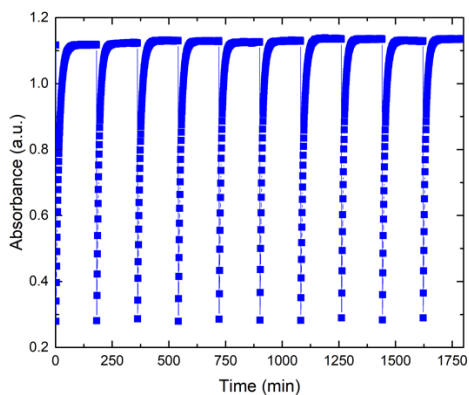

**Figure S 59** **3c** was irradiated ten times for 2 minute

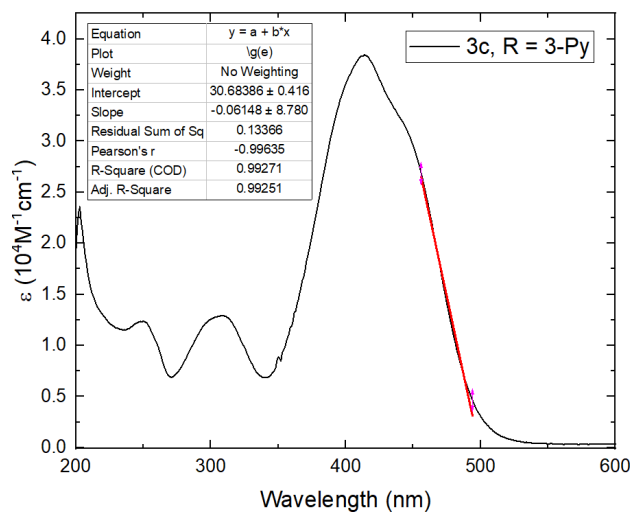

**Figure S 60.** Estimation of Optical GAP for **3c**

## X.1 UV-Visible studies of compound **3d**

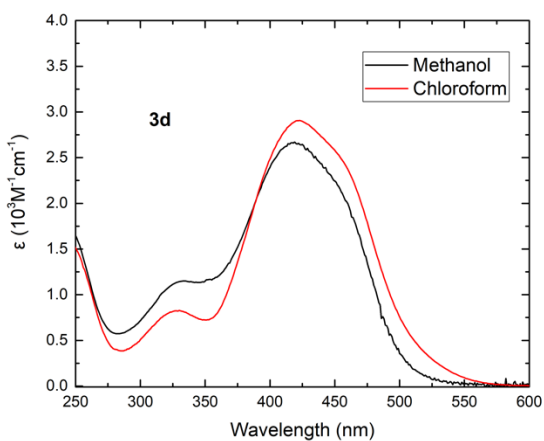

**Figure S 61** UV-Visible spectra of compound **3d** in different solvents.

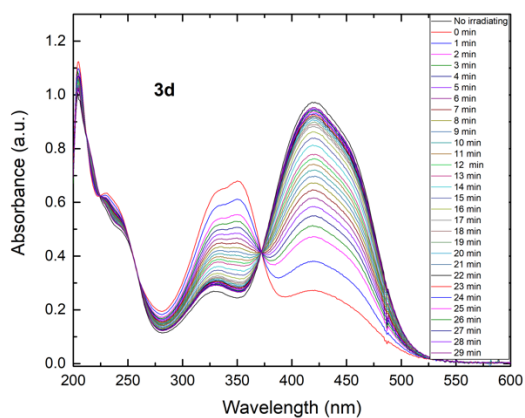

**Figure S 62** UV-vis spectra for **3d** ( $3.8 \times 10^{-5} \text{M}$ , MeOH) after white light irradiation (PSS) and cis-trans return.

| Compound      | Methanol                                           | Chloroform                                         |
|---------------|----------------------------------------------------|----------------------------------------------------|
| <br><b>3d</b> | $\lambda_{\text{max}} = 418$<br>$\epsilon = 25264$ | $\lambda_{\text{max}} = 423$<br>$\epsilon = 30749$ |

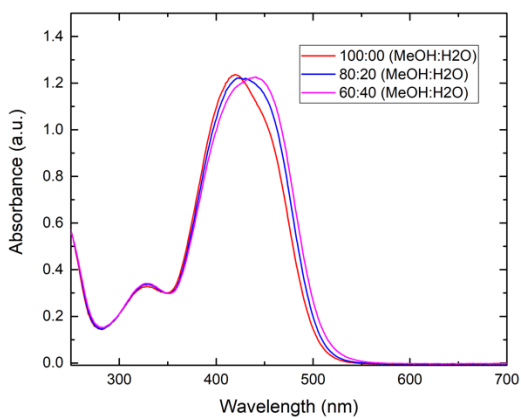

**Figure S 63** UV-visible spectra of compound **3d** in different ratios MeOH/H<sub>2</sub>O.

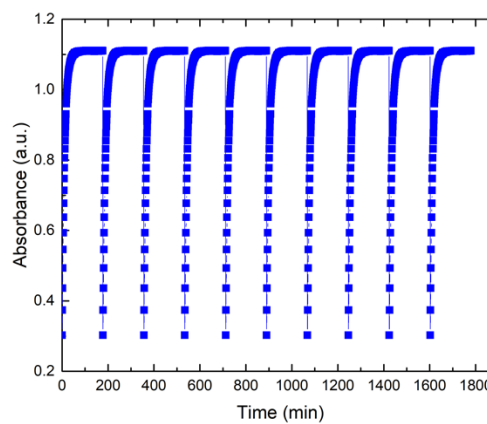

**Figure S 64** **3d** was irradiated ten times for 2 minute

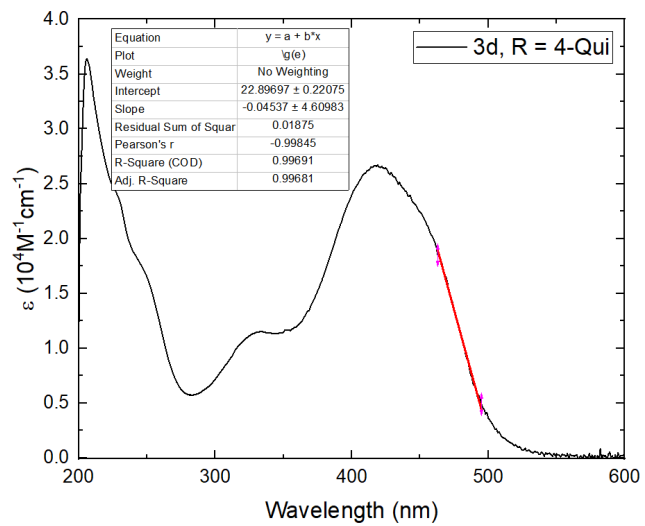

**Figure S 65.** Estimation of Optical GAP for **3d**

.1 UV-Visible studies of compound **4b**

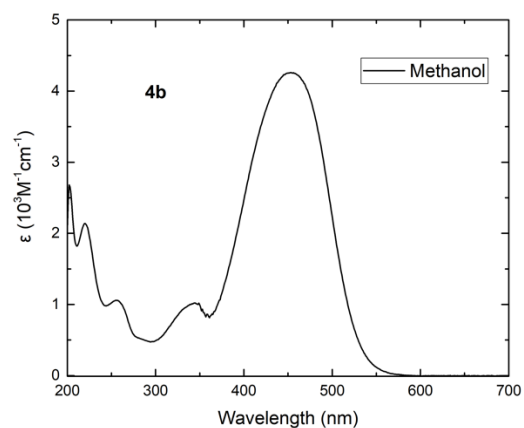

**Figure S 66** UV-Visible spectra of compound **4b** in different solvents.

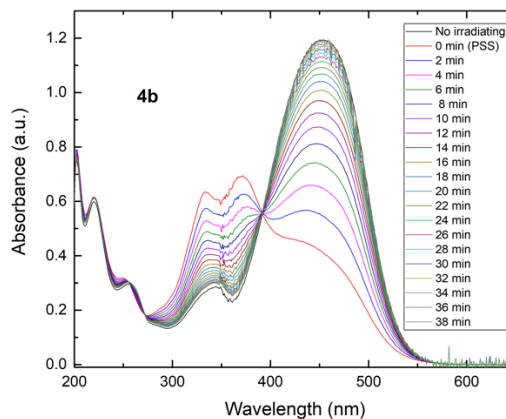

**Figure S 67** UV-vis spectra for **4b** ( $3 \times 10^{-5} \text{M}$ , MeOH) after white light irradiation (PSS) and cis-trans return.

| Compound                                                                                                                        | Methanol                                                                                                     |
|---------------------------------------------------------------------------------------------------------------------------------|--------------------------------------------------------------------------------------------------------------|
| 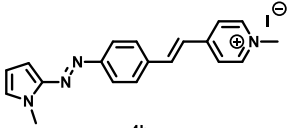 <p style="text-align: center;"><b>4b</b></p> | <p style="text-align: center;"><math>\lambda_{\text{max}} = 454</math><br/><math>\epsilon = 39843</math></p> |

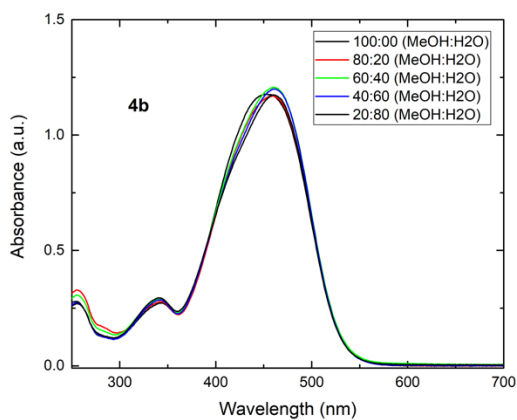

**Figure S 68** UV-visible spectra of compound **4b** in different ratios MeOH/H<sub>2</sub>O.

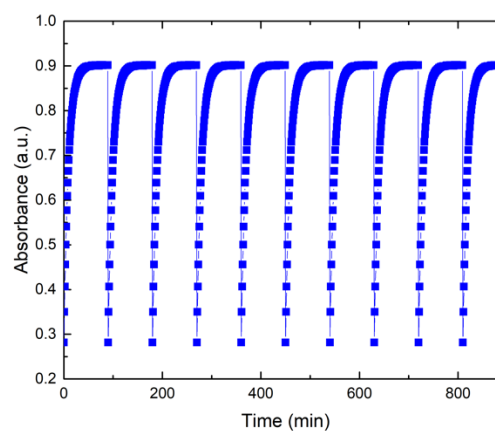

**Figure S 69** **4b** was irradiated ten times for 2 minute



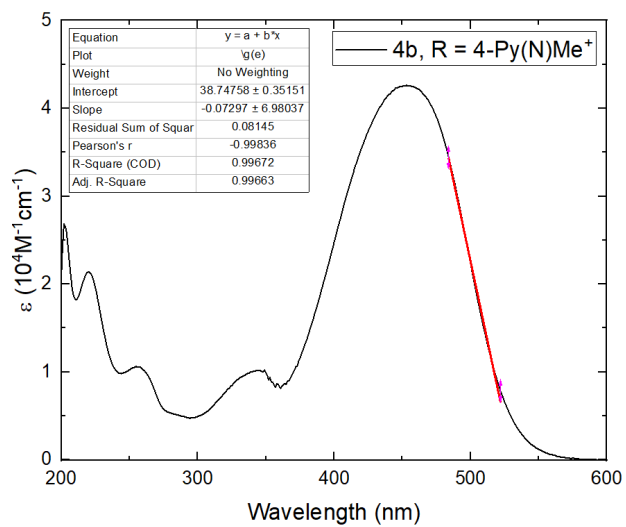

**Figure S 70.** Estimation of Optical GAP for **4b**

## X.1 UV-Visible studies of compound 4c

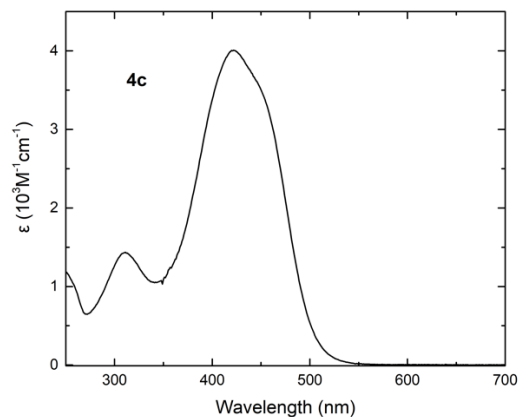

**Figure S 71** UV-Visible spectra of compound **3c** in different solvents.

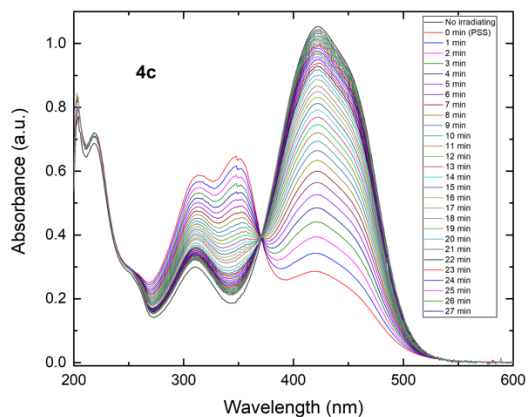

**Figure S 72** UV-vis spectra for **4c** ( $2.6 \times 10^{-5}M$ , MeOH) after white light irradiation (PSS) and cis-trans return.

| Compound                                     | Methanol                                           |
|----------------------------------------------|----------------------------------------------------|
| <p style="text-align: center;"><b>4c</b></p> | $\lambda_{\text{max}} = 422$<br>$\epsilon = 40425$ |

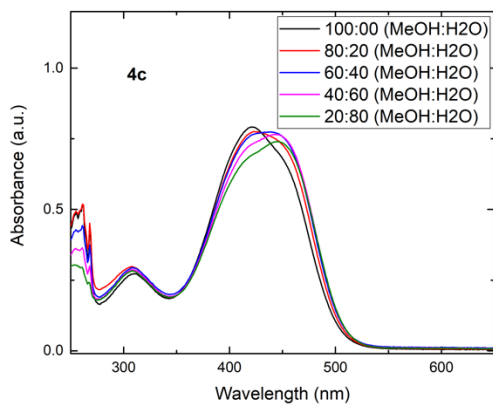

**Figure S 73** UV-visible spectra of compound **4c** in different ratios MeOH/H<sub>2</sub>O.

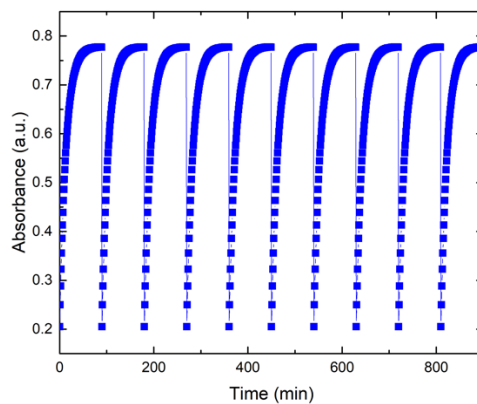

**Figure S 74** **4c** was irradiated ten times for 2 minutes.

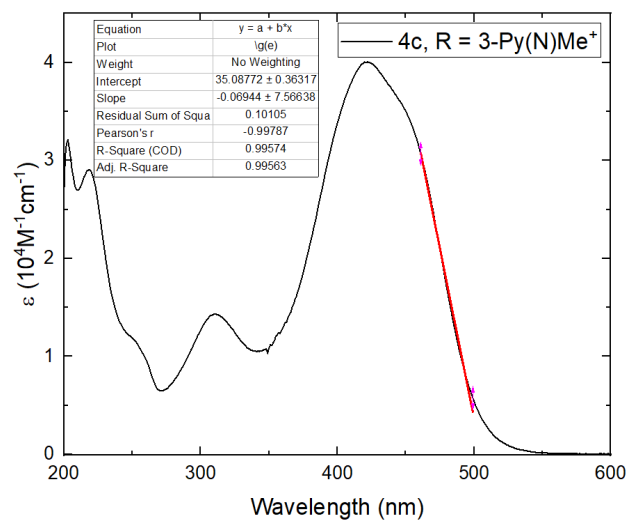

**Figure S 75.** Estimation of Optical GAP for **4c**

## X.1 UV-Visible studies of compound **4d**

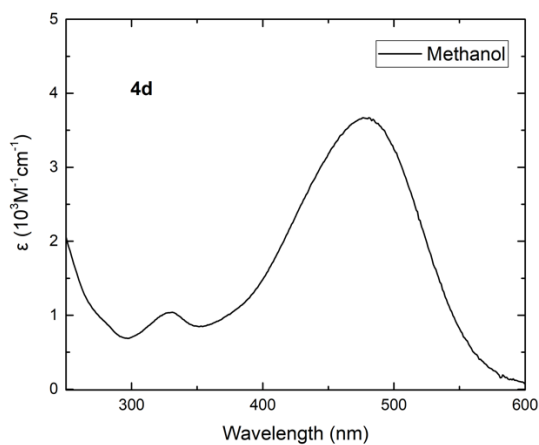

**Figure S 76** UV-Visible spectra of compound **4d** in different solvents.

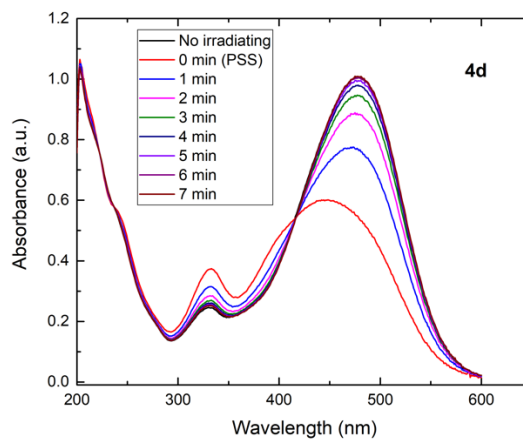

**Figure S 77** UV-vis spectra for **4d** ( $2.7 \times 10^{-5} \text{M}$ , MeOH) after white light irradiation (PSS) and cis-trans return.

| Compound                                                                                                                         | Methanol                                                                         |
|----------------------------------------------------------------------------------------------------------------------------------|----------------------------------------------------------------------------------|
| 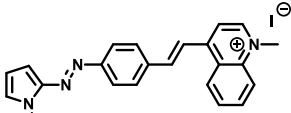 <p style="text-align: center;"><b>4d</b></p> | <p><math>\lambda_{\text{max}} = 476</math><br/><math>\epsilon = 37570</math></p> |

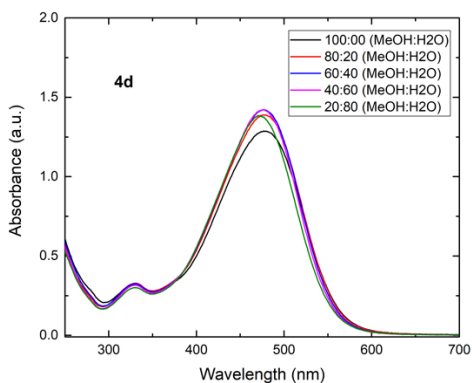

**Figure S 78** UV-visible spectra of compound **4d** in different ratios MeOH/H<sub>2</sub>O.

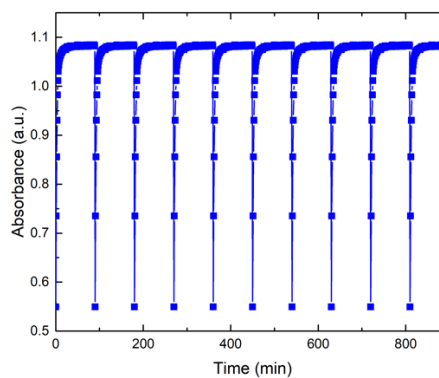

**Figure S 79** **4d** was irradiated ten times for 2 minute

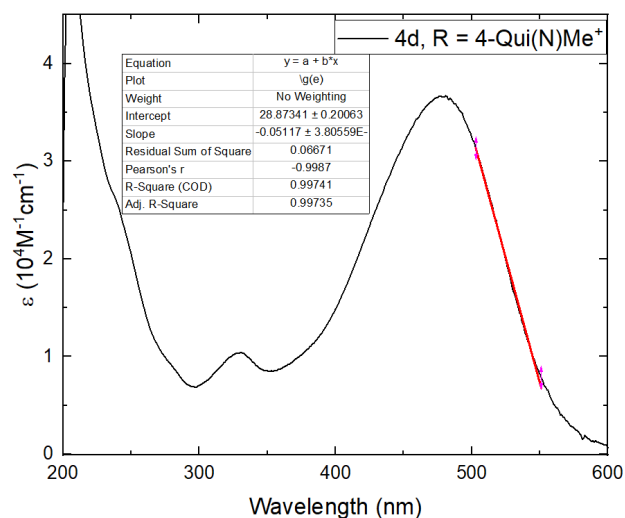

**Figure S 80.** Estimation of Optical GAP for **4d**

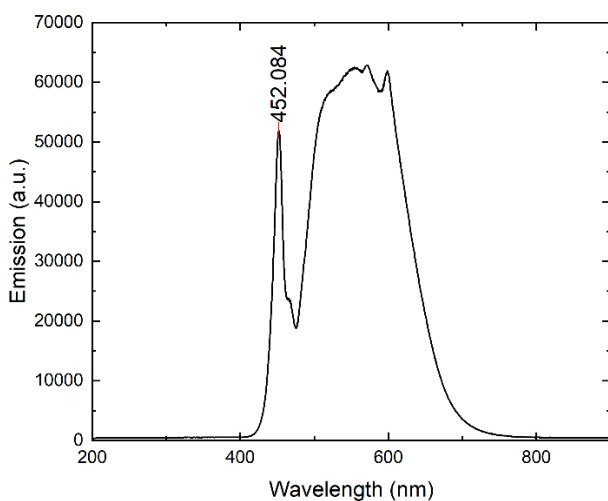

**Figure S 81.** Emission spectrum of the white led used in the photoisomerization processes.

## X.2 Computational studies

In this link

<https://www.dropbox.com/scl/fi/fks2387g3gz1np386p75z/xyz.zip?rlkey=qp4jzhuub2el6dqojv5entvmm&dl=0>

the interested reader can download the xyz files of the local minima of the compounds **2a-2g**, **3a-3d** and **4b-4d** optimized in gas phase, in chloroform and in methanol.

Table S2. Values of  $\Delta Q(\Omega_A)$  (equation (4) in the main body of the manuscript) for the QTAIM basins within compounds **2a-2g** addressed in this investigation. The atom numbering can be found in the xyz files attached to this document. The atoms for which

$|\Delta Q(\Omega_A)| < 5 \times 10^{-3}$  are not reported. Atomic units are used throughout.

| <b>2a</b> |                      | <b>2b</b> |                      | <b>2c</b> |                      | <b>2d</b> |                      | <b>2e</b> |                      | <b>2f</b> |                      | <b>2g</b> |                      |
|-----------|----------------------|-----------|----------------------|-----------|----------------------|-----------|----------------------|-----------|----------------------|-----------|----------------------|-----------|----------------------|
| Átomo     | $\Delta Q(\Omega_A)$ |
| N2        | 0.02                 |
| N3        | 0.02                 |
| H5        | -0.01                |
| H6        | 0.01                 |
| H7        | -0.01                |
| C8        | 0.01                 |
| H10       | -0.02                |
| C13       | -0.01                |
| C16       | 0.01                 |
| H17       | 0.01                 |
| C18       | 0.01                 |
| H19       | -0.02                |
| C20       | 0.01                 |
| C21       | 0.01                 | H22       | -0.01                | C21       | 0.01                 | C21       | 0.01                 | C21       | 0.01                 | H22       | -0.01                | C21       | 0.01                 |
| H22       | -0.01                |           |                      | H22       | -0.01                | H22       | -0.01                | H22       | -0.01                |           |                      | H22       | -0.01                |

Table S3. Values of  $\Delta Q(\Omega_A)$  (equation (4) in the main body of the manuscript) for the QTAIM basins within compounds **3a-3d** addressed in this investigation. The atom numbering can be found in the xyz files attached to this document. . The atoms for which

$|\Delta Q(\Omega_A)| < 5 \times 10^{-3}$  are not reported. Atomic units are used throughout.

| <b>3a</b> |                      | <b>3b</b> |                      | <b>3c</b> |                      | <b>3d</b> |                      |
|-----------|----------------------|-----------|----------------------|-----------|----------------------|-----------|----------------------|
| Átomo     | $\Delta Q(\Omega_A)$ |
| C30       | -0.01                | N2        | 0.03                 | N2        | 0.02                 | N2        | 0.02                 |
| C32       | -0.01                | N3        | 0.02                 | N3        | 0.02                 | N3        | 0.02                 |
| C35       | -0.01                | H5        | -0.01                | H5        | -0.01                | H5        | -0.01                |
| C37       | -0.01                | H6        | 0.01                 | H6        | 0.01                 | H6        | 0.01                 |
| Fe38      | 0.09                 | H7        | -0.01                | H7        | -0.01                | H7        | -0.01                |
| C39       | -0.01                | C8        | 0.01                 | C8        | 0.01                 | C8        | 0.01                 |
| C40       | -0.01                | H10       | -0.02                | H10       | -0.02                | H10       | -0.02                |
| C43       | -0.01                | C13       | -0.01                | C13       | -0.01                | C13       | -0.01                |
| C44       | -0.01                | C16       | 0.01                 | C16       | 0.01                 | C16       | 0.01                 |
| C47       | -0.01                | H17       | 0.01                 | H17       | 0.01                 | H17       | 0.01                 |
|           |                      | C18       | 0.01                 | C18       | 0.01                 | C18       | 0.01                 |
|           |                      | H19       | -0.02                | H19       | -0.02                | H19       | -0.02                |
|           |                      | C20       | 0.01                 | C20       | 0.01                 | C20       | 0.01                 |
|           |                      | H22       | -0.01                | H22       | -0.01                | C21       | 0.01                 |
|           |                      | H28       | -0.01                | H28       | -0.01                | H22       | -0.01                |

Table S4. Values of  $\Delta Q(\Omega_A)$  (equation (4) in the main body of the manuscript) for the QTAIM basins within compounds **4b**, **4c** and **4d** addressed in this investigation. The atom numbering can be found in the xyz files attached to this document. The atoms for which

$|\Delta Q(\Omega_A)| < 5 \times 10^{-3}$  are not reported. Atomic units are used throughout.

| <b>4b</b> |                      | <b>4c</b> |                      | <b>4d</b> |                      |
|-----------|----------------------|-----------|----------------------|-----------|----------------------|
| Átomo     | $\Delta Q(\Omega_A)$ | Átomo     | $\Delta Q(\Omega_A)$ | Átomo     | $\Delta Q(\Omega_A)$ |
| N3        | 0.02                 | N3        | 0.02                 | N3        | 0.02                 |
| C4        | -0.01                | C4        | -0.01                | C4        | -0.01                |
| H5        | 0.01                 | H5        | 0.01                 | H5        | 0.01                 |
| H6        | 0.01                 | H6        | 0.01                 | H6        | 0.01                 |
| H7        | 0.01                 | H7        | 0.01                 | H7        | 0.01                 |
| C8        | 0.02                 | C8        | 0.03                 | C8        | 0.03                 |
| C9        | 0.01                 | C9        | 0.01                 | C9        | 0.01                 |
| H10       | 0.02                 | H10       | 0.02                 | H10       | 0.02                 |
| C11       | 0.01                 | C11       | 0.02                 | C11       | 0.02                 |
| H12       | 0.02                 | H12       | 0.02                 | H12       | 0.02                 |
| C13       | 0.02                 | C13       | 0.02                 | C13       | 0.02                 |
| H14       | 0.02                 | H14       | 0.02                 | H14       | 0.03                 |
| C15       | 0.01                 | C15       | 0.01                 | C15       | 0.01                 |
| H17       | 0.01                 | C16       | 0.01                 | C16       | 0.01                 |
| C25       | -0.02                | H17       | 0.01                 | H17       | 0.01                 |
| H26       | -0.01                | H24       | 0.01                 | H24       | 0.01                 |
| H28       | -0.01                | C25       | -0.02                | C25       | -0.02                |
| C29       | -0.01                | H26       | -0.01                | H26       | -0.01                |
| C30       | -0.01                | H28       | -0.01                | C27       | 0.01                 |
| H31       | -0.02                | C29       | -0.01                | H28       | -0.01                |
| C32       | -0.02                | C30       | -0.02                | C29       | -0.01                |
| H33       | -0.02                | H31       | -0.03                | C30       | -0.01                |
| C35       | -0.01                | C32       | -0.01                | H31       | -0.02                |
| H36       | -0.02                | H33       | -0.02                | C32       | -0.03                |
| C37       | -0.01                | C34       | -0.04                | H33       | -0.02                |
| H38       | -0.01                | H36       | -0.02                | H36       | -0.02                |
| C39       | 0.01                 | H38       | -0.02                | C38       | -0.01                |
| H40       | -0.01                | C39       | 0.01                 | C39       | -0.01                |
| H41       | -0.01                | H40       | -0.01                | C40       | -0.01                |
| H42       | -0.01                | H41       | -0.01                | H41       | -0.02                |
|           |                      | H42       | -0.01                | C42       | -0.01                |
|           |                      |           |                      | H43       | -0.01                |
|           |                      |           |                      | H44       | -0.02                |
|           |                      |           |                      | C45       | 0.01                 |
|           |                      |           |                      | H46       | -0.01                |
|           |                      |           |                      | H47       | -0.01                |
|           |                      |           |                      | H48       | -0.01                |



## References

---

- <sup>i</sup> F. Hochberger-Roa, S. Cortés-Mendoza, D. Gallardo-Rosas, R. A. Toscano, M. C. Ortega-Alfaro and J. G. López-Cortés, *Adv. Synth. Catal.* 2019, **361**, 4055—4064.
- <sup>ii</sup> (a) J. A. Balam-Villarreal, B. J. López-Mayorga, R. A. Toscano, M. P. Carreón-Castro, V. Basiuk, F. Cortés-Guzmán, J. G. López-Cortés and M. C. Ortega-Alfaro, *Org. Biomol. Chem.*, 2020, **18**, 1657-1670. (b) L. Muñoz Rugeles, D. Gallardo-Rosas, J. Durán-Hernández, R. López-Arteaga, R. A. Toscano, N. Esturau-Escofet, J. G. López Cortés, J. Peon Peralta and M. C. Ortega Alfaro, *Chemphotochem*, 2020, **4**, 144-154.
- <sup>iii</sup> (a) J. Pschierer, N. Peschek and H. Plenio, *Green Chem.* 2010, **12**, 636-642. (b) A. Gordillo, E. de Jesus and C. López-Mardomingo, *Chem. Commun.* 2007, **39**, 4056-4058. (c) T. Li, F. Guo, Z. Zha and Z. Wang, *Chem. Asian. J.* 2013, **8**, 534-537.
- <sup>iv</sup> A. Altomare, G. Cascarano, C. Giacovazzo, A. Guagliardi, M. C. Burla, G. Polidori and M. Canalli, *J. Appl. Crystallogr.* 1994, **27**, 435-436.
- <sup>v</sup> G.M. Sheldrick, *Acta Crystallogr.* 2008, **A64**, 112-122.
